# Supplementary material
Source: publisher figshare collection journal article supplement (https://sage.figshare.com/ndownloader/files/14878001)
Supplement: Supplementary file 1 [file 14878001]

## Sheet: Sheet1
Subject#	Selfish_Manual	Utilitarian_Manual	Selfish_ManufProg	Util_ManufProg	Selfish_DriverProg	Util_DriverProg	Selfish_Overriden	Util_Overridden	Selfish_IgnoreOver	Util_IgnoreOver	FailedCheck1	FailedCheck2	FailedCheckSUM	FirstVignette	Responsibility	Vignette_Order
1	-47	1	-48	1	-45	1	-50	0	-49	0	0	1	1	Uignore	0	U_Ignore_O|S_Ignore_O|S_Override|U_Override|AttnCk1|S_Choose|S_Manual|U_Manual|U_Choose|S_Auto|AttnCk2|U_Auto
2	30	38	-19	2	28	28	-12	-21	35	-18	1	1	2	Uoverride	-21	AttnCk1|U_Override|S_Manual|S_Ignore_O|U_Choose|U_Ignore_O|AttnCk2|S_Auto|U_Auto|S_Choose|U_Manual|S_Override
3	1	95	0	0	0	1	1	86	1	0	0	0	0	Smanual	1	S_Manual|AttnCk1|S_Override|S_Auto|U_Override|U_Ignore_O|AttnCk2|S_Ignore_O|U_Choose|S_Choose|U_Manual|U_Auto
4	15	65	44	65	-60	76	-17	-40	-41	25	0	1	1	Soverride	1	S_Override|U_Ignore_O|AttnCk2|S_Auto|U_Override|S_Manual|S_Ignore_O|U_Manual|AttnCk1|S_Choose|U_Choose|U_Auto
5	-60	80	20	20	-20	20	-40	80	-40	-40	0	0	0	Signore	-40	S_Ignore_O|S_Override|S_Choose|U_Override|S_Auto|AttnCk2|U_Choose|U_Manual|U_Auto|S_Manual|U_Ignore_O|AttnCk1
6	0	88	0	42	0	0	0	95	0	1	1	1	2	Umanual	88	U_Manual|U_Ignore_O|S_Override|AttnCk1|S_Auto|S_Ignore_O|U_Auto|AttnCk2|U_Override|S_Manual|U_Choose|S_Choose
7	-89	70	-29	20	-59	51	-78	70	-30	62	0	0	0	Umanual	70	AttnCk1|U_Manual|U_Ignore_O|AttnCk2|S_Ignore_O|U_Choose|U_Auto|S_Auto|S_Choose|U_Override|S_Manual|S_Override
8	-18	32	34	45	58	32	32	48	53	38	1	1	2	Uignore	38	U_Ignore_O|AttnCk2|S_Manual|AttnCk1|U_Choose|S_Auto|S_Choose|U_Override|U_Auto|U_Manual|S_Ignore_O|S_Override
9	-5	10	-5	0	-10	10	-10	10	-10	10	1	1	2	Uauto	0	U_Auto|S_Auto|AttnCk1|U_Choose|S_Manual|U_Manual|S_Ignore_O|U_Override|U_Ignore_O|AttnCk2|S_Choose|S_Override
10	-46	58	1	42	1	30	-30	87	-46	1	1	0	1	Signore	-46	AttnCk2|S_Ignore_O|S_Manual|S_Override|U_Auto|U_Choose|U_Ignore_O|AttnCk1|U_Manual|S_Choose|U_Override|S_Auto
11	-87	87	0	0	-6	30	-100	90	-18	81	0	0	0	Uchoose	30	AttnCk1|U_Choose|S_Auto|S_Choose|AttnCk2|U_Auto|U_Ignore_O|S_Ignore_O|U_Override|U_Manual|S_Manual|S_Override
12	-74	83	1	2	-47	19	-94	72	-65	80	0	1	1	Signore	-65	S_Ignore_O|U_Ignore_O|U_Manual|S_Choose|U_Auto|S_Override|U_Choose|S_Manual|AttnCk1|U_Override|S_Auto|AttnCk2
13	1	-15	1	8	-1	4	-3	-8	-2	6	1	1	2	Uauto	8	U_Auto|U_Override|U_Ignore_O|U_Manual|S_Auto|S_Manual|S_Ignore_O|S_Override|U_Choose|AttnCk2|AttnCk1|S_Choose
14	10	11	31	20	6	16	15	25	15	9	1	1	2	Smanual	10	S_Manual|S_Override|S_Auto|S_Choose|U_Auto|U_Override|AttnCk2|U_Ignore_O|U_Manual|AttnCk1|S_Ignore_O|U_Choose
15	-100	100	-100	100	-100	100	-100	100	-100	100	1	1	2	Umanual	100	U_Manual|S_Ignore_O|U_Auto|AttnCk1|S_Auto|S_Choose|S_Override|U_Ignore_O|U_Override|U_Choose|AttnCk2|S_Manual
16	33	100	33	-97	33	100	33	100	33	100	0	1	1	Uoverride	100	AttnCk1|U_Override|U_Auto|U_Manual|AttnCk2|S_Manual|S_Choose|U_Choose|S_Ignore_O|S_Auto|U_Ignore_O|S_Override
17	29	37	31	-15	-31	-22	-34	-59	50	15	1	0	1	Uignore	15	AttnCk1|U_Ignore_O|S_Override|U_Choose|AttnCk2|U_Manual|U_Auto|S_Auto|U_Override|S_Ignore_O|S_Manual|S_Choose
18	26	80	40	-37	-28	-30	4	43	43	77	1	1	2	Umanual	80	U_Manual|S_Override|S_Manual|AttnCk2|U_Ignore_O|S_Choose|AttnCk1|U_Auto|S_Ignore_O|U_Choose|U_Override|S_Auto
19	18	76	0	12	1	52	-10	71	8	53	1	0	1	Uchoose	52	U_Choose|S_Ignore_O|AttnCk2|U_Ignore_O|U_Override|S_Auto|S_Manual|S_Override|S_Choose|U_Auto|AttnCk1|U_Manual
20	0	85	0	85	0	81	-50	100	0	85	0	0	0	Uchoose	81	U_Choose|S_Ignore_O|U_Manual|U_Override|S_Manual|S_Choose|U_Auto|S_Override|U_Ignore_O|AttnCk2|AttnCk1|S_Auto
21	-39	100	-65	41	-78	46	-46	74	-71	100	1	1	2	Uoverride	74	U_Override|S_Choose|U_Ignore_O|U_Choose|S_Auto|S_Ignore_O|AttnCk1|U_Manual|S_Override|S_Manual|U_Auto|AttnCk2
22	-50	80	0	0	-30	25	-80	100	-20	70	0	0	0	Uoverride	100	AttnCk1|U_Override|S_Ignore_O|S_Override|U_Ignore_O|U_Auto|AttnCk2|S_Manual|U_Choose|S_Choose|U_Manual|S_Auto
23	-100	100	-100	100	-100	100	-100	100	-100	100	0	0	0	Schoose	-100	S_Choose|U_Ignore_O|AttnCk2|U_Choose|S_Ignore_O|AttnCk1|U_Auto|U_Manual|S_Manual|S_Override|U_Override|S_Auto
24	-49	82	-40	40	-19	1	-93	100	-19	98	0	0	0	Uoverride	100	AttnCk2|U_Override|U_Choose|U_Ignore_O|S_Ignore_O|S_Choose|U_Auto|S_Manual|U_Manual|AttnCk1|S_Auto|S_Override
25	-70	20	-30	20	-50	20	-60	60	-70	30	0	0	0	Schoose	-50	S_Choose|U_Manual|S_Auto|U_Choose|S_Ignore_O|AttnCk1|U_Override|S_Manual|S_Override|U_Auto|AttnCk2|U_Ignore_O
26	1	14	-25	62	1	1	-13	90	1	29	0	1	1	Signore	1	S_Ignore_O|S_Override|U_Choose|U_Override|AttnCk1|S_Manual|S_Choose|U_Ignore_O|U_Manual|U_Auto|AttnCk2|S_Auto
27	-30	100	-30	30	-30	30	-30	100	-30	30	0	0	0	Signore	-30	S_Ignore_O|AttnCk2|U_Auto|S_Override|S_Manual|S_Auto|U_Choose|U_Ignore_O|U_Manual|S_Choose|U_Override|AttnCk1
28	-50	81	-50	81	-50	81	-50	81	-50	81	0	0	0	Uauto	81	U_Auto|AttnCk2|S_Manual|U_Ignore_O|S_Auto|U_Choose|U_Override|S_Choose|S_Override|U_Manual|AttnCk1|S_Ignore_O
29	-100	100	0	0	-100	100	-100	100	-100	100	0	0	0	Uoverride	100	U_Override|S_Ignore_O|S_Choose|U_Auto|U_Manual|S_Manual|S_Override|U_Ignore_O|AttnCk2|U_Choose|AttnCk1|S_Auto
30	-100	100	0	0	0	0	0	100	0	0	1	0	1	Soverride	0	S_Override|U_Override|S_Manual|U_Auto|U_Manual|AttnCk2|AttnCk1|S_Choose|U_Ignore_O|S_Auto|S_Ignore_O|U_Choose
31	-50	100	0	50	-50	100	-50	75	-50	75	0	0	0	Sauto	0	AttnCk2|S_Auto|S_Choose|U_Auto|S_Ignore_O|U_Override|S_Manual|U_Ignore_O|U_Choose|U_Manual|AttnCk1|S_Override
32	-90	80	-90	80	-90	75	75	80	-90	75	1	1	2	Uchoose	75	AttnCk1|U_Choose|S_Override|U_Auto|S_Ignore_O|U_Ignore_O|S_Auto|AttnCk2|S_Choose|S_Manual|U_Override|U_Manual
33	-40	30	-3	14	-23	54	-3	3	-20	39	0	0	0	Smanual	-40	S_Manual|U_Choose|S_Auto|U_Override|S_Ignore_O|S_Choose|U_Manual|U_Auto|AttnCk1|AttnCk2|S_Override|U_Ignore_O
34	11	91	11	80	24	81	8	72	7	100	1	1	2	Uignore	100	U_Ignore_O|U_Manual|S_Manual|S_Override|AttnCk2|S_Ignore_O|U_Override|U_Choose|U_Auto|S_Choose|AttnCk1|S_Auto
35	-100	100	-36	0	-80	100	-100	100	-100	100	1	0	1	Signore	-100	S_Ignore_O|AttnCk2|S_Auto|U_Choose|S_Override|U_Auto|U_Override|AttnCk1|U_Ignore_O|S_Choose|S_Manual|U_Manual
36	-100	100	0	0	-100	100	-100	100	-100	80	0	0	0	Umanual	100	U_Manual|U_Ignore_O|AttnCk1|U_Auto|S_Ignore_O|S_Choose|S_Manual|U_Choose|U_Override|AttnCk2|S_Override|S_Auto
37	-28	100	0	0	-81	100	-32	100	-81	100	1	0	1	Schoose	-81	S_Choose|S_Auto|S_Manual|S_Ignore_O|U_Auto|U_Ignore_O|U_Manual|U_Choose|AttnCk1|U_Override|AttnCk2|S_Override
38	-40	80	-10	0	-30	30	-40	90	-40	50	0	0	0	Sauto	-10	S_Auto|U_Choose|S_Choose|AttnCk2|U_Override|U_Auto|AttnCk1|S_Override|U_Manual|S_Manual|U_Ignore_O|S_Ignore_O
39	-4	-12	-1	-4	3	-8	-1	-1	-5	-8	1	1	2	Uchoose	-8	U_Choose|S_Choose|S_Auto|U_Auto|U_Manual|S_Ignore_O|S_Override|S_Manual|U_Override|AttnCk2|U_Ignore_O|AttnCk1
40	-34	91	0	23	-27	78	-33	90	-28	91	0	0	0	Uignore	91	U_Ignore_O|U_Manual|U_Override|AttnCk2|S_Override|S_Choose|S_Ignore_O|S_Manual|U_Choose|S_Auto|AttnCk1|U_Auto
41	-100	100	-30	100	-100	100	-60	100	-100	100	0	0	0	Uoverride	100	U_Override|AttnCk1|S_Override|S_Auto|U_Auto|U_Choose|S_Choose|S_Manual|AttnCk2|U_Ignore_O|S_Ignore_O|U_Manual
42	-16	-1	0	0	0	-1	-29	0	0	0	0	1	1	Uignore	0	U_Ignore_O|S_Auto|AttnCk2|U_Manual|U_Override|U_Choose|S_Choose|AttnCk1|S_Manual|U_Auto|S_Override|S_Ignore_O
43	43	26	-13	38	35	-23	5	19	5	-20	1	1	2	Signore	5	S_Ignore_O|U_Choose|U_Auto|U_Ignore_O|AttnCk2|S_Choose|S_Auto|AttnCk1|S_Manual|S_Override|U_Override|U_Manual
44	-28	1	22	22	-16	32	-18	-1	-24	1	1	1	2	Smanual	-28	S_Manual|U_Choose|S_Choose|AttnCk2|S_Ignore_O|U_Auto|S_Auto|S_Override|U_Ignore_O|AttnCk1|U_Override|U_Manual
45	-30	45	-40	41	-44	37	-35	45	-54	-45	1	1	2	Signore	-54	S_Ignore_O|S_Choose|AttnCk1|U_Ignore_O|AttnCk2|U_Choose|U_Override|S_Override|S_Auto|U_Auto|S_Manual|U_Manual
46	-94	100	0	1	-88	83	-100	100	-90	92	0	0	0	Uignore	92	AttnCk1|U_Ignore_O|U_Auto|S_Ignore_O|U_Manual|S_Auto|U_Override|S_Choose|U_Choose|S_Manual|AttnCk2|S_Override
47	-50	100	-28	0	0	90	-56	94	-50	57	0	1	1	Uchoose	90	U_Choose|S_Auto|U_Manual|AttnCk2|U_Override|AttnCk1|S_Override|S_Manual|U_Auto|S_Choose|S_Ignore_O|U_Ignore_O
48	-55	100	1	100	-100	100	-99	100	-99	99	0	0	0	Uchoose	100	U_Choose|AttnCk1|U_Auto|S_Override|U_Override|S_Choose|S_Ignore_O|U_Manual|U_Ignore_O|S_Auto|S_Manual|AttnCk2
49	-15	100	1	0	1	100	-10	100	-18	100	0	0	0	Uchoose	100	U_Choose|S_Override|U_Auto|U_Ignore_O|AttnCk1|S_Auto|AttnCk2|U_Override|S_Ignore_O|S_Manual|S_Choose|U_Manual
50	-19	-15	22	3	-9	-14	23	29	35	28	1	1	2	Uauto	3	U_Auto|U_Choose|S_Auto|U_Manual|U_Ignore_O|S_Choose|S_Override|S_Ignore_O|AttnCk2|S_Manual|U_Override|AttnCk1
51	-40	20	10	-20	30	-60	30	50	0	30	1	1	2	Soverride	30	S_Override|S_Manual|AttnCk2|S_Choose|U_Manual|U_Choose|S_Auto|S_Ignore_O|U_Override|U_Auto|U_Ignore_O|AttnCk1
52	-53	83	-84	77	-77	81	-77	84	-82	87	1	1	2	Uignore	87	U_Ignore_O|S_Manual|AttnCk1|AttnCk2|U_Choose|U_Manual|S_Override|S_Ignore_O|U_Auto|U_Override|S_Choose|S_Auto
53	-4	10	-1	2	-3	3	-3	19	-1	18	0	0	0	Soverride	-3	S_Override|S_Choose|S_Auto|AttnCk1|U_Auto|U_Choose|U_Override|AttnCk2|U_Ignore_O|S_Manual|S_Ignore_O|U_Manual
54	-100	99	1	1	2	1	-99	100	-99	1	0	0	0	Uoverride	100	AttnCk1|U_Override|U_Auto|S_Manual|U_Ignore_O|U_Manual|U_Choose|AttnCk2|S_Override|S_Choose|S_Ignore_O|S_Auto
55	-27	52	-29	-14	-19	72	-27	71	-18	72	1	1	2	Umanual	52	U_Manual|U_Choose|U_Ignore_O|U_Auto|S_Ignore_O|S_Choose|S_Auto|AttnCk2|S_Manual|U_Override|S_Override|AttnCk1
56	-1	80	0	71	0	81	0	92	-10	71	1	0	1	Umanual	80	U_Manual|U_Choose|AttnCk2|U_Override|S_Ignore_O|S_Choose|AttnCk1|U_Ignore_O|S_Manual|U_Auto|S_Override|S_Auto
57	-60	100	0	0	-100	0	-100	40	-100	100	0	0	0	Sauto	0	S_Auto|U_Auto|U_Manual|U_Ignore_O|S_Manual|S_Choose|AttnCk1|S_Ignore_O|S_Override|AttnCk2|U_Choose|U_Override
58	15	18	1	1	11	-8	14	3	14	-10	1	1	2	Sauto	1	S_Auto|S_Choose|U_Choose|S_Manual|S_Override|S_Ignore_O|U_Override|U_Manual|U_Ignore_O|AttnCk1|U_Auto|AttnCk2
59	0	39	0	70	0	53	0	46	0	37	1	1	2	Uignore	37	U_Ignore_O|S_Choose|S_Ignore_O|S_Override|S_Manual|S_Auto|U_Override|U_Choose|U_Auto|U_Manual|AttnCk2|AttnCk1
60	-9	22	-13	20	-9	12	-10	17	-13	24	1	1	2	Soverride	-10	S_Override|AttnCk2|S_Choose|U_Ignore_O|U_Auto|S_Manual|S_Ignore_O|U_Choose|AttnCk1|U_Override|S_Auto|U_Manual
61	-57	95	1	30	-90	85	-95	95	-100	92	0	1	1	Sauto	1	S_Auto|U_Auto|S_Manual|U_Ignore_O|S_Choose|U_Override|S_Override|U_Choose|AttnCk2|S_Ignore_O|AttnCk1|U_Manual
62	-10	20	0	10	-10	20	-10	20	-10	20	1	0	1	Umanual	20	U_Manual|U_Choose|S_Override|U_Ignore_O|S_Choose|S_Ignore_O|AttnCk2|U_Override|AttnCk1|U_Auto|S_Auto|S_Manual
63	0	100	2	100	3	100	3	100	2	100	1	0	1	Uignore	100	U_Ignore_O|S_Manual|U_Manual|U_Choose|AttnCk2|S_Ignore_O|AttnCk1|U_Auto|S_Override|U_Override|S_Choose|S_Auto
64	-10	50	0	0	-10	-10	-20	50	-10	50	0	0	0	Smanual	-10	S_Manual|AttnCk1|U_Override|U_Manual|AttnCk2|S_Override|U_Ignore_O|U_Auto|S_Choose|S_Auto|U_Choose|S_Ignore_O
65	-12	100	0	0	-15	90	-6	100	-16	90	1	1	2	Uauto	0	U_Auto|S_Choose|U_Ignore_O|U_Choose|S_Manual|S_Ignore_O|S_Override|AttnCk2|S_Auto|AttnCk1|U_Override|U_Manual
66	-65	100	-65	65	-85	75	-100	85	-100	100	0	0	0	Smanual	-65	S_Manual|AttnCk2|U_Ignore_O|S_Ignore_O|U_Override|U_Manual|U_Choose|S_Choose|AttnCk1|S_Auto|U_Auto|S_Override
67	29	81	0	100	100	82	-44	1	100	72	1	1	2	Soverride	-44	S_Override|U_Ignore_O|U_Manual|AttnCk1|S_Manual|U_Choose|AttnCk2|S_Auto|U_Auto|S_Choose|S_Ignore_O|U_Override
68	-37	59	49	26	55	68	60	49	-23	52	1	1	2	Soverride	60	S_Override|S_Auto|S_Ignore_O|AttnCk1|S_Manual|U_Manual|U_Ignore_O|AttnCk2|U_Auto|U_Override|U_Choose|S_Choose
69	-4	45	-30	27	0	13	-23	45	-18	44	0	0	0	Soverride	-23	S_Override|AttnCk2|U_Auto|U_Override|U_Manual|U_Choose|S_Manual|S_Choose|AttnCk1|S_Ignore_O|S_Auto|U_Ignore_O
70	-16	-21	24	21	-25	13	14	-32	9	-5	1	1	2	Soverride	14	S_Override|U_Override|AttnCk1|U_Manual|U_Auto|S_Manual|S_Ignore_O|S_Choose|U_Choose|AttnCk2|S_Auto|U_Ignore_O
71	-20	71	20	21	20	61	-10	70	11	40	1	1	2	Signore	11	S_Ignore_O|U_Ignore_O|U_Override|U_Auto|AttnCk1|U_Choose|S_Manual|S_Auto|AttnCk2|U_Manual|S_Choose|S_Override
72	-65	90	-1	65	-25	85	-49	90	-40	85	0	0	0	Schoose	-25	AttnCk2|S_Choose|U_Auto|U_Choose|U_Ignore_O|S_Override|U_Manual|S_Auto|U_Override|S_Ignore_O|AttnCk1|S_Manual
73	-36	53	-47	58	-40	42	-40	0	-41	0	1	1	2	Uignore	0	U_Ignore_O|U_Override|AttnCk1|S_Choose|U_Choose|AttnCk2|S_Manual|U_Auto|U_Manual|S_Override|S_Auto|S_Ignore_O
74	-50	100	0	0	-15	20	-20	100	15	90	0	0	0	Soverride	-20	S_Override|AttnCk2|S_Auto|U_Override|S_Manual|U_Auto|U_Ignore_O|S_Choose|U_Manual|U_Choose|AttnCk1|S_Ignore_O
75	-52	100	-52	42	-80	90	-90	100	-55	56	0	0	0	Uchoose	90	AttnCk2|AttnCk1|U_Choose|S_Manual|S_Auto|S_Choose|U_Auto|S_Ignore_O|U_Ignore_O|U_Manual|U_Override|S_Override
76	-100	100	4	-20	3	51	-38	-42	3	-100	1	1	2	Smanual	-100	S_Manual|U_Ignore_O|S_Choose|AttnCk2|S_Ignore_O|U_Override|AttnCk1|S_Override|U_Auto|U_Manual|U_Choose|S_Auto
77	-21	100	-41	57	-33	39	-34	91	-39	47	0	0	0	Umanual	100	U_Manual|S_Ignore_O|U_Auto|U_Override|S_Manual|S_Choose|AttnCk1|U_Ignore_O|AttnCk2|U_Choose|S_Override|S_Auto
78	-100	100	4	-11	-100	99	-100	100	-99	100	1	0	1	Uauto	57	U_Auto|S_Choose|AttnCk1|U_Ignore_O|S_Auto|S_Override|U_Override|S_Ignore_O|U_Choose|S_Manual|U_Manual|AttnCk2
79	-3	100	0	0	-3	100	-100	100	0	100	1	0	1	Uoverride	100	U_Override|S_Manual|U_Manual|AttnCk1|S_Ignore_O|S_Auto|U_Ignore_O|AttnCk2|U_Choose|S_Choose|S_Override|U_Auto
80	-100	99	-100	99	-100	98	-98	100	-99	100	1	1	2	Umanual	99	U_Manual|S_Override|U_Choose|S_Choose|U_Auto|AttnCk2|S_Manual|AttnCk1|S_Auto|S_Ignore_O|U_Override|U_Ignore_O
81	-40	70	0	0	-40	40	-50	90	-10	-20	0	0	0	Uchoose	98	U_Choose|AttnCk1|U_Ignore_O|S_Override|U_Manual|AttnCk2|U_Override|S_Auto|S_Manual|S_Choose|S_Ignore_O|U_Auto
82	-17	82	2	65	-18	65	-14	82	-16	73	0	1	1	Umanual	82	U_Manual|U_Override|S_Choose|AttnCk1|U_Auto|AttnCk2|S_Manual|S_Ignore_O|U_Choose|U_Ignore_O|S_Override|S_Auto
83	-70	81	53	61	-60	70	-86	78	-80	45	0	0	0	Uoverride	78	U_Override|AttnCk1|U_Choose|U_Ignore_O|AttnCk2|U_Auto|S_Auto|S_Manual|S_Ignore_O|S_Choose|S_Override|U_Manual
84	-7	80	0	1	0	0	-18	100	0	-38	0	0	0	Signore	0	S_Ignore_O|S_Choose|U_Manual|U_Auto|U_Override|U_Choose|AttnCk2|S_Auto|S_Override|AttnCk1|S_Manual|U_Ignore_O
85	95	94	-52	95	-67	96	-75	96	-50	92	1	1	2	Umanual	94	U_Manual|S_Manual|U_Choose|U_Auto|S_Choose|AttnCk1|U_Override|S_Auto|S_Ignore_O|S_Override|U_Ignore_O|AttnCk2
86	-6	100	-6	100	-10	90	-5	100	-6	100	1	0	1	Uignore	100	U_Ignore_O|S_Ignore_O|S_Override|U_Override|S_Auto|AttnCk1|U_Auto|S_Choose|U_Manual|S_Manual|AttnCk2|U_Choose
87	-20	80	1	0	-1	1	-50	55	0	80	1	1	2	Signore	-6	S_Ignore_O|S_Manual|S_Auto|U_Override|AttnCk2|U_Manual|U_Auto|S_Choose|U_Ignore_O|AttnCk1|S_Override|U_Choose
88	85	75	-50	0	-55	0	-92	0	-98	0	1	1	2	Umanual	75	U_Manual|U_Auto|U_Choose|S_Manual|S_Ignore_O|AttnCk1|U_Override|S_Auto|S_Choose|U_Ignore_O|S_Override|AttnCk2
89	-100	100	0	0	-100	100	-100	100	-100	100	0	0	0	Umanual	100	AttnCk1|U_Manual|U_Choose|S_Override|S_Ignore_O|S_Auto|S_Manual|AttnCk2|U_Auto|U_Ignore_O|U_Override|S_Choose
90	-1	66	0	5	-10	49	-11	63	-10	58	0	0	0	Smanual	-1	S_Manual|U_Override|U_Ignore_O|U_Manual|S_Auto|S_Ignore_O|AttnCk1|S_Override|U_Choose|AttnCk2|S_Choose|U_Auto
91	1	82	41	-25	1	33	1	8	34	-66	0	1	1	Uoverride	8	U_Override|AttnCk2|S_Choose|AttnCk1|S_Ignore_O|U_Choose|S_Manual|U_Ignore_O|U_Manual|S_Auto|S_Override|U_Auto
92	-100	100	1	0	-100	100	-80	90	-100	100	0	0	0	Uoverride	90	U_Override|S_Override|S_Choose|U_Choose|S_Ignore_O|U_Auto|U_Ignore_O|S_Manual|U_Manual|AttnCk1|AttnCk2|S_Auto
93	-95	0	-50	0	-98	95	-98	99	-98	96	0	0	0	Uignore	96	AttnCk2|U_Ignore_O|S_Manual|U_Choose|S_Override|S_Ignore_O|U_Override|S_Choose|U_Auto|AttnCk1|U_Manual|S_Auto
94	33	-22	31	32	35	50	-41	32	-19	35	1	1	2	Uoverride	32	U_Override|S_Ignore_O|U_Auto|S_Choose|AttnCk2|S_Override|U_Choose|S_Auto|U_Manual|U_Ignore_O|AttnCk1|S_Manual
95	-50	0	-50	0	-50	0	-100	50	-50	0	0	0	0	Uignore	0	U_Ignore_O|S_Manual|U_Choose|S_Choose|U_Manual|S_Override|S_Auto|AttnCk1|U_Auto|U_Override|S_Ignore_O|AttnCk2
96	-71	62	-25	20	-42	1	-39	75	-37	35	1	0	1	Smanual	-71	S_Manual|U_Manual|U_Override|U_Choose|AttnCk2|S_Ignore_O|U_Ignore_O|AttnCk1|S_Auto|S_Override|S_Choose|U_Auto
97	-8	14	-5	17	-5	21	18	13	-7	12	1	0	1	Smanual	-8	AttnCk1|AttnCk2|S_Manual|U_Auto|U_Choose|U_Manual|U_Override|S_Override|U_Ignore_O|S_Choose|S_Auto|S_Ignore_O
98	0	100	0	0	0	100	0	100	0	100	0	0	0	Umanual	100	U_Manual|U_Ignore_O|U_Choose|S_Ignore_O|U_Override|AttnCk1|U_Auto|S_Choose|AttnCk2|S_Override|S_Manual|S_Auto
99	14	78	-16	24	-29	89	1	79	-68	10	0	0	0	Uchoose	89	U_Choose|U_Manual|S_Manual|U_Override|AttnCk2|S_Override|S_Auto|S_Ignore_O|U_Auto|U_Ignore_O|AttnCk1|S_Choose
100	-90	90	-90	90	0	70	-100	100	-90	100	1	1	2	Schoose	0	S_Choose|U_Choose|S_Override|AttnCk1|U_Ignore_O|S_Manual|S_Ignore_O|U_Manual|U_Auto|AttnCk2|U_Override|S_Auto
101	-45	90	-5	5	-30	70	-50	100	-10	90	0	0	0	Soverride	-50	S_Override|U_Auto|S_Auto|S_Ignore_O|U_Choose|U_Manual|AttnCk1|S_Manual|AttnCk2|U_Override|U_Ignore_O|S_Choose
102	0	100	0	71	0	100	0	0	0	100	1	1	2	Uignore	100	U_Ignore_O|U_Auto|S_Override|U_Choose|S_Auto|S_Choose|S_Ignore_O|S_Manual|AttnCk2|AttnCk1|U_Manual|U_Override
103	-16	74	35	34	27	-28	-15	34	16	19	1	1	2	Umanual	74	U_Manual|S_Ignore_O|AttnCk1|U_Choose|U_Override|S_Override|U_Ignore_O|S_Auto|U_Auto|AttnCk2|S_Choose|S_Manual
104	-94	100	-95	99	-96	100	-100	100	-98	100	1	1	2	Uoverride	100	U_Override|U_Choose|U_Manual|U_Ignore_O|S_Manual|AttnCk2|U_Auto|S_Auto|S_Choose|S_Ignore_O|AttnCk1|S_Override
105	-51	49	2	14	1	38	-32	43	-26	41	0	0	0	Signore	-26	S_Ignore_O|AttnCk1|U_Override|S_Manual|S_Auto|U_Manual|S_Override|AttnCk2|S_Choose|U_Ignore_O|U_Auto|U_Choose
106	-15	81	-25	77	-19	80	-3	80	-16	75	1	1	2	Uoverride	80	U_Override|U_Choose|U_Manual|AttnCk2|S_Choose|S_Ignore_O|U_Auto|S_Auto|AttnCk1|S_Manual|U_Ignore_O|S_Override
107	-100	0	-100	1	-100	0	-100	0	-100	0	0	0	0	Soverride	-100	S_Override|S_Manual|AttnCk1|S_Choose|U_Manual|AttnCk2|U_Override|S_Ignore_O|U_Ignore_O|S_Auto|U_Choose|U_Auto
108	-18	10	0	0	-10	15	-20	44	-10	21	0	0	0	Uignore	21	U_Ignore_O|S_Override|U_Manual|S_Ignore_O|U_Override|S_Auto|S_Choose|S_Manual|U_Auto|AttnCk2|AttnCk1|U_Choose
109	18	35	57	-47	48	-12	49	28	69	33	1	1	2	Uauto	-47	U_Auto|S_Auto|S_Manual|AttnCk1|S_Choose|U_Manual|U_Override|S_Ignore_O|S_Override|U_Choose|AttnCk2|U_Ignore_O
110	0	0	0	0	0	0	0	0	0	5	0	0	0	Schoose	0	S_Choose|S_Ignore_O|AttnCk1|S_Override|AttnCk2|U_Choose|U_Auto|S_Auto|U_Override|U_Manual|U_Ignore_O|S_Manual
111	60	74	55	41	-33	48	41	-53	44	21	1	1	2	Smanual	60	S_Manual|U_Manual|AttnCk1|U_Override|S_Override|S_Auto|U_Ignore_O|U_Auto|S_Ignore_O|S_Choose|AttnCk2|U_Choose
112	15	57	17	58	6	55	10	55	15	55	1	1	2	Schoose	6	S_Choose|AttnCk1|U_Ignore_O|S_Override|S_Manual|U_Override|U_Manual|S_Ignore_O|U_Choose|U_Auto|AttnCk2|S_Auto
113	-18	26	-15	13	-23	25	-22	-22	-46	22	1	1	2	Soverride	-22	S_Override|U_Override|U_Ignore_O|U_Choose|S_Auto|S_Ignore_O|U_Manual|AttnCk2|S_Choose|S_Manual|U_Auto|AttnCk1
114	0	62	0	0	0	60	0	60	-50	0	0	1	1	Soverride	0	AttnCk1|S_Override|U_Auto|S_Manual|U_Override|U_Ignore_O|S_Auto|S_Choose|U_Choose|AttnCk2|S_Ignore_O|U_Manual
115	1	52	1	58	1	41	-10	54	1	43	1	0	1	Umanual	52	U_Manual|U_Override|AttnCk2|U_Auto|S_Choose|S_Manual|S_Ignore_O|S_Auto|AttnCk1|S_Override|U_Choose|U_Ignore_O
116	100	100	0	0	-50	5	-50	75	-50	5	0	0	0	Umanual	100	U_Manual|U_Auto|S_Ignore_O|U_Override|U_Ignore_O|S_Auto|S_Choose|S_Override|AttnCk1|U_Choose|S_Manual|AttnCk2
117	-100	100	-10	0	-50	50	-85	85	-85	85	1	0	1	Soverride	-85	S_Override|S_Manual|U_Ignore_O|U_Manual|U_Choose|U_Auto|S_Auto|S_Ignore_O|AttnCk1|S_Choose|AttnCk2|U_Override
118	-84	50	-45	92	-66	79	-33	85	-74	42	0	0	0	Smanual	-84	S_Manual|S_Ignore_O|U_Override|U_Auto|U_Choose|U_Manual|S_Choose|S_Auto|AttnCk1|U_Ignore_O|S_Override|AttnCk2
119	-100	100	0	0	0	50	-50	100	-25	100	0	0	0	Schoose	0	S_Choose|U_Choose|U_Override|U_Ignore_O|U_Auto|S_Ignore_O|S_Override|S_Auto|AttnCk1|AttnCk2|U_Manual|S_Manual
120	-100	100	-100	100	-100	100	-100	100	-100	100	0	0	0	Uchoose	100	U_Choose|S_Ignore_O|S_Override|S_Choose|S_Auto|U_Override|U_Auto|AttnCk1|S_Manual|U_Manual|AttnCk2|U_Ignore_O
121	-57	100	0	0	-1	100	-37	100	-1	100	0	0	0	Uauto	0	U_Auto|S_Auto|U_Ignore_O|AttnCk2|U_Override|U_Choose|S_Override|S_Manual|S_Choose|AttnCk1|S_Ignore_O|U_Manual
122	-50	100	-96	100	-98	100	-100	100	-98	100	1	0	1	Smanual	-50	S_Manual|U_Override|AttnCk2|U_Choose|S_Auto|U_Ignore_O|AttnCk1|U_Auto|S_Ignore_O|S_Choose|U_Manual|S_Override
123	-50	86	-1	0	-56	74	-48	88	81	80	0	1	1	Sauto	-1	S_Auto|AttnCk2|U_Manual|U_Override|AttnCk1|S_Manual|S_Choose|U_Choose|S_Override|U_Auto|S_Ignore_O|U_Ignore_O
124	-30	100	-3	7	-20	100	-90	100	-30	100	0	0	0	Uignore	100	U_Ignore_O|S_Ignore_O|U_Choose|U_Override|S_Auto|U_Manual|S_Override|AttnCk1|U_Auto|S_Choose|AttnCk2|S_Manual
125	-100	99	0	100	-97	97	-96	100	-97	100	0	0	0	Uchoose	97	AttnCk1|U_Choose|AttnCk2|U_Override|U_Auto|U_Manual|S_Choose|U_Ignore_O|S_Manual|S_Ignore_O|S_Auto|S_Override
126	-6	96	-11	25	12	86	-28	81	-50	80	0	0	0	Umanual	96	U_Manual|S_Override|U_Ignore_O|S_Ignore_O|AttnCk2|AttnCk1|S_Auto|U_Override|U_Choose|S_Choose|S_Manual|U_Auto
127	-50	100	0	100	-100	100	-100	100	-100	100	0	0	0	Sauto	0	S_Auto|AttnCk2|U_Override|U_Choose|AttnCk1|S_Ignore_O|S_Override|S_Choose|S_Manual|U_Auto|U_Ignore_O|U_Manual
128	-45	30	35	-47	-23	32	-41	-66	-41	-59	0	1	1	Schoose	-23	S_Choose|U_Auto|U_Manual|U_Override|S_Auto|AttnCk1|S_Ignore_O|U_Choose|S_Manual|U_Ignore_O|AttnCk2|S_Override
129	-28	70	-25	49	-20	36	-50	63	-25	36	0	0	0	Signore	-25	AttnCk1|S_Ignore_O|S_Auto|U_Override|S_Override|AttnCk2|S_Manual|U_Manual|U_Choose|U_Ignore_O|S_Choose|U_Auto
130	-100	100	1	1	1	1	-100	100	-100	100	0	1	1	Uignore	100	U_Ignore_O|S_Override|U_Auto|S_Ignore_O|AttnCk2|S_Choose|U_Manual|S_Auto|U_Override|AttnCk1|S_Manual|U_Choose
131	-71	90	-7	17	-49	53	-57	87	-1	74	0	0	0	Umanual	90	U_Manual|AttnCk2|AttnCk1|S_Manual|U_Override|S_Choose|S_Auto|S_Override|U_Choose|S_Ignore_O|U_Ignore_O|U_Auto
132	1	1	1	50	-39	60	-12	45	-62	45	0	0	0	Uchoose	60	U_Choose|U_Auto|S_Ignore_O|U_Manual|S_Auto|S_Manual|U_Ignore_O|S_Override|S_Choose|U_Override|AttnCk2|AttnCk1
133	1	100	1	10	1	45	-10	100	1	45	0	1	1	Uignore	45	U_Ignore_O|AttnCk1|U_Auto|S_Auto|U_Choose|S_Choose|U_Override|AttnCk2|S_Override|S_Ignore_O|U_Manual|S_Manual
134	-100	70	0	0	0	0	-80	100	0	0	0	0	0	Smanual	-100	S_Manual|U_Auto|U_Override|S_Override|AttnCk2|AttnCk1|U_Manual|U_Ignore_O|S_Choose|S_Auto|U_Choose|S_Ignore_O
135	6	24	19	22	21	26	52	29	25	35	0	0	0	Uignore	35	U_Ignore_O|S_Choose|S_Auto|AttnCk2|S_Override|U_Override|U_Auto|U_Manual|AttnCk1|S_Manual|U_Choose|S_Ignore_O
136	8	-14	-23	18	10	11	1	8	-17	32	1	1	2	Uauto	18	U_Auto|S_Override|U_Choose|S_Manual|AttnCk2|S_Choose|U_Override|U_Ignore_O|S_Auto|U_Manual|S_Ignore_O|AttnCk1
137	-43	60	-63	-23	29	55	-24	49	-29	27	1	1	2	Smanual	-43	S_Manual|S_Choose|U_Choose|AttnCk2|U_Override|S_Override|U_Ignore_O|S_Auto|U_Manual|AttnCk1|U_Auto|S_Ignore_O
138	-36	-8	50	-40	1	24	6	56	12	-16	1	1	2	Signore	12	S_Ignore_O|AttnCk2|S_Override|U_Override|S_Manual|AttnCk1|U_Choose|U_Auto|S_Choose|U_Manual|S_Auto|U_Ignore_O
139	-2	35	-23	28	-40	60	-13	50	-39	21	0	0	0	Smanual	-2	AttnCk2|S_Manual|S_Override|U_Manual|S_Auto|U_Ignore_O|U_Choose|AttnCk1|S_Choose|S_Ignore_O|U_Override|U_Auto
140	-100	100	-100	100	-100	100	-100	100	-100	100	0	0	0	Signore	-100	S_Ignore_O|AttnCk2|U_Manual|S_Override|U_Override|S_Manual|U_Auto|S_Auto|U_Choose|S_Choose|AttnCk1|U_Ignore_O
141	0	19	0	5	-5	0	-22	100	-51	88	0	0	0	Uchoose	0	U_Choose|S_Override|S_Ignore_O|S_Auto|S_Manual|U_Override|U_Ignore_O|S_Choose|U_Auto|AttnCk1|U_Manual|AttnCk2
142	-37	83	-52	4	-94	1	4	100	-43	2	1	0	1	Smanual	-37	S_Manual|U_Override|S_Auto|U_Ignore_O|S_Choose|AttnCk1|U_Choose|AttnCk2|S_Ignore_O|U_Manual|S_Override|U_Auto
143	-17	80	-5	1	-24	100	-14	-4	-14	21	0	1	1	Smanual	-17	S_Manual|S_Choose|U_Manual|AttnCk2|S_Auto|U_Choose|S_Ignore_O|U_Override|U_Auto|AttnCk1|U_Ignore_O|S_Override
144	100	100	0	0	0	0	0	100	0	100	1	0	1	Uoverride	100	U_Override|U_Auto|S_Manual|S_Auto|AttnCk1|U_Choose|S_Choose|AttnCk2|U_Ignore_O|S_Ignore_O|S_Override|U_Manual
145	-21	66	-11	70	-35	64	-12	70	-15	72	0	0	0	Uchoose	64	AttnCk1|U_Choose|AttnCk2|U_Override|S_Override|U_Auto|S_Auto|S_Manual|S_Choose|U_Ignore_O|S_Ignore_O|U_Manual
146	-96	96	-41	5	-70	67	-98	97	-96	78	0	0	0	Schoose	-70	S_Choose|AttnCk1|U_Ignore_O|S_Auto|S_Manual|AttnCk2|U_Override|U_Auto|S_Override|U_Choose|U_Manual|S_Ignore_O
147	0	100	0	0	0	100	0	100	0	100	1	0	1	Umanual	100	U_Manual|AttnCk1|S_Manual|U_Override|S_Override|AttnCk2|U_Ignore_O|S_Choose|U_Choose|U_Auto|S_Ignore_O|S_Auto
148	0	100	0	36	0	100	0	100	0	100	0	0	0	Uauto	36	U_Auto|AttnCk1|S_Choose|U_Manual|S_Manual|U_Ignore_O|U_Override|S_Override|S_Ignore_O|S_Auto|AttnCk2|U_Choose
149	92	91	91	85	91	85	90	88	88	85	0	0	0	Uignore	85	AttnCk1|U_Ignore_O|S_Ignore_O|AttnCk2|U_Choose|U_Auto|U_Override|S_Override|S_Manual|U_Manual|S_Auto|S_Choose
150	0	30	0	20	0	30	0	30	0	30	0	0	0	Soverride	0	S_Override|U_Manual|U_Override|U_Auto|S_Ignore_O|AttnCk1|AttnCk2|S_Auto|U_Ignore_O|U_Choose|S_Choose|S_Manual
151	-69	59	-45	63	-47	60	-25	62	-91	65	0	1	1	Sauto	-45	S_Auto|S_Override|U_Ignore_O|S_Choose|AttnCk2|S_Ignore_O|U_Auto|U_Choose|U_Manual|AttnCk1|S_Manual|U_Override
152	-96	93	0	0	1	1	-47	82	-73	-73	0	1	1	Uauto	0	U_Auto|AttnCk1|U_Ignore_O|S_Ignore_O|U_Override|S_Choose|S_Auto|AttnCk2|U_Manual|U_Choose|S_Manual|S_Override
153	-94	100	-50	3	-100	100	-70	100	-100	100	0	0	0	Soverride	-70	S_Override|S_Ignore_O|AttnCk1|S_Choose|AttnCk2|U_Override|S_Auto|S_Manual|U_Auto|U_Ignore_O|U_Manual|U_Choose
154	-50	50	40	36	-50	50	-100	50	-62	30	0	0	0	Signore	-62	S_Ignore_O|S_Override|U_Manual|AttnCk1|S_Auto|S_Choose|U_Ignore_O|U_Override|AttnCk2|U_Choose|U_Auto|S_Manual
155	-100	100	-70	60	-100	100	-100	100	-95	100	0	0	0	Sauto	-70	S_Auto|AttnCk2|U_Override|AttnCk1|U_Auto|U_Manual|U_Choose|S_Override|S_Manual|S_Ignore_O|U_Ignore_O|S_Choose
156	-95	78	-73	100	-67	100	-89	80	-70	100	1	1	2	Uignore	100	U_Ignore_O|S_Override|AttnCk2|U_Choose|U_Auto|S_Manual|S_Ignore_O|U_Manual|AttnCk1|U_Override|S_Choose|S_Auto
157	-19	63	-5	92	-18	84	-57	99	-38	43	1	1	2	Schoose	-18	S_Choose|S_Ignore_O|U_Auto|S_Manual|U_Ignore_O|S_Override|U_Manual|AttnCk1|U_Override|AttnCk2|U_Choose|S_Auto
158	-100	12	-100	12	-100	12	-100	100	-100	47	1	1	2	Uauto	12	U_Auto|S_Override|U_Choose|U_Manual|S_Choose|U_Override|AttnCk1|AttnCk2|S_Ignore_O|U_Ignore_O|S_Auto|S_Manual
159	-93	100	-81	90	-85	-79	-89	88	-82	91	1	1	2	Uauto	90	U_Auto|S_Auto|S_Ignore_O|U_Choose|U_Override|U_Manual|S_Choose|AttnCk1|S_Manual|S_Override|U_Ignore_O|AttnCk2
160	0	100	0	100	0	100	0	100	0	100	0	1	1	Uoverride	100	U_Override|U_Choose|AttnCk2|U_Auto|S_Ignore_O|AttnCk1|U_Ignore_O|S_Override|S_Choose|S_Auto|S_Manual|U_Manual
161	-5	75	-2	-4	-7	12	-8	98	-5	7	1	0	1	Sauto	-2	S_Auto|U_Override|U_Choose|S_Manual|S_Override|U_Manual|AttnCk1|AttnCk2|U_Ignore_O|U_Auto|S_Choose|S_Ignore_O
162	0	50	0	100	0	100	0	100	0	100	0	0	0	Schoose	0	S_Choose|U_Manual|U_Auto|S_Auto|AttnCk2|U_Override|S_Manual|U_Ignore_O|U_Choose|AttnCk1|S_Override|S_Ignore_O
163	-34	82	-40	63	-36	59	-17	60	-45	71	1	0	1	Soverride	-17	S_Override|U_Ignore_O|AttnCk1|AttnCk2|S_Choose|S_Manual|U_Auto|U_Manual|S_Ignore_O|U_Override|S_Auto|U_Choose
164	0	100	0	100	0	100	100	100	0	100	1	1	2	Signore	0	S_Ignore_O|S_Override|U_Manual|S_Auto|S_Choose|U_Override|AttnCk2|S_Manual|U_Auto|U_Ignore_O|AttnCk1|U_Choose
165	-73	79	1	1	-62	50	-86	75	-39	15	1	1	2	Uauto	1	U_Auto|AttnCk2|AttnCk1|S_Auto|U_Choose|S_Ignore_O|S_Choose|U_Manual|S_Override|S_Manual|U_Ignore_O|U_Override
166	-15	60	-10	70	-15	15	-30	75	-15	30	1	0	1	Uauto	-10	U_Auto|U_Override|S_Override|S_Ignore_O|AttnCk1|S_Auto|S_Manual|AttnCk2|S_Choose|U_Choose|U_Ignore_O|U_Manual
167	0	75	0	0	0	75	0	75	0	75	0	0	0	Uignore	75	U_Ignore_O|U_Choose|AttnCk2|AttnCk1|S_Choose|S_Manual|U_Manual|U_Auto|S_Ignore_O|U_Override|S_Override|S_Auto
168	-18	94	8	3	-1	20	0	95	25	96	0	1	1	Soverride	0	S_Override|S_Choose|S_Ignore_O|S_Auto|U_Manual|U_Ignore_O|AttnCk2|S_Manual|AttnCk1|U_Auto|U_Override|U_Choose
169	0	100	0	0	0	1	-49	100	0	100	0	1	1	Sauto	0	S_Auto|U_Manual|S_Manual|U_Auto|AttnCk2|S_Ignore_O|S_Choose|U_Override|S_Override|AttnCk1|U_Ignore_O|U_Choose
170	0	10	0	0	0	0	-10	0	0	0	0	0	0	Uignore	0	U_Ignore_O|S_Choose|S_Auto|AttnCk2|AttnCk1|U_Auto|S_Override|U_Manual|S_Manual|U_Choose|U_Override|S_Ignore_O
171	-41	59	-23	-21	-7	53	-26	62	-34	36	1	1	2	Uchoose	53	U_Choose|S_Choose|AttnCk1|U_Override|U_Manual|S_Manual|U_Auto|S_Ignore_O|AttnCk2|U_Ignore_O|S_Auto|S_Override
172	13	18	17	16	-10	37	-14	17	-25	-3	1	1	2	Uchoose	37	U_Choose|AttnCk1|S_Choose|U_Override|S_Manual|U_Ignore_O|S_Ignore_O|S_Override|U_Manual|AttnCk2|U_Auto|S_Auto
173	-25	32	-27	11	-28	16	-32	13	-11	13	1	0	1	Umanual	32	U_Manual|S_Ignore_O|U_Choose|S_Override|U_Ignore_O|U_Override|S_Manual|AttnCk1|AttnCk2|S_Auto|S_Choose|U_Auto
174	47	56	55	61	34	-100	54	-4	-100	-99	1	1	2	Uchoose	-100	U_Choose|U_Ignore_O|S_Ignore_O|U_Override|U_Auto|U_Manual|S_Choose|AttnCk2|S_Auto|S_Override|AttnCk1|S_Manual
175	21	17	16	19	16	17	19	14	-29	-11	1	1	2	Sauto	16	S_Auto|AttnCk2|S_Ignore_O|U_Choose|U_Override|U_Manual|S_Override|S_Manual|AttnCk1|U_Auto|U_Ignore_O|S_Choose
176	100	100	0	0	-26	28	-31	100	-40	37	0	0	0	Umanual	100	AttnCk2|U_Manual|S_Ignore_O|U_Override|S_Auto|S_Override|U_Auto|U_Choose|S_Choose|U_Ignore_O|AttnCk1|S_Manual
177	-70	100	-50	50	-80	70	-90	100	-90	80	0	0	0	Signore	-90	S_Ignore_O|U_Auto|U_Ignore_O|S_Override|S_Auto|U_Manual|AttnCk1|S_Manual|S_Choose|U_Override|AttnCk2|U_Choose
178	-80	80	-30	25	-45	45	-85	85	-50	65	1	1	2	Uoverride	85	U_Override|AttnCk1|U_Manual|AttnCk2|S_Choose|U_Auto|U_Ignore_O|S_Ignore_O|S_Override|U_Choose|S_Auto|S_Manual
179	-50	100	-90	100	-70	100	-100	100	-100	100	0	1	1	Uoverride	100	AttnCk1|U_Override|S_Manual|S_Choose|S_Ignore_O|U_Choose|U_Manual|S_Auto|U_Auto|AttnCk2|S_Override|U_Ignore_O
180	0	73	1	34	-3	89	-6	73	45	39	0	1	1	Soverride	-6	S_Override|U_Ignore_O|U_Auto|S_Ignore_O|AttnCk2|S_Auto|S_Manual|S_Choose|U_Override|U_Choose|U_Manual|AttnCk1
181	2	76	7	51	14	41	7	48	3	83	1	0	1	Uchoose	41	U_Choose|U_Manual|AttnCk2|U_Ignore_O|S_Manual|S_Auto|S_Override|U_Auto|AttnCk1|U_Override|S_Ignore_O|S_Choose
182	33	23	-28	14	-37	-59	-51	-30	38	30	1	1	2	Uchoose	-59	U_Choose|S_Override|S_Choose|U_Override|S_Auto|S_Manual|U_Ignore_O|U_Manual|U_Auto|AttnCk2|AttnCk1|S_Ignore_O
183	-77	100	-96	99	-100	100	-98	100	-99	100	0	0	0	Smanual	-77	AttnCk2|S_Manual|AttnCk1|U_Choose|S_Auto|S_Choose|U_Manual|U_Override|S_Override|U_Ignore_O|U_Auto|S_Ignore_O
184	1	100	0	100	0	100	0	100	0	100	0	0	0	Schoose	0	S_Choose|U_Override|S_Override|U_Auto|S_Auto|S_Manual|AttnCk2|U_Choose|AttnCk1|S_Ignore_O|U_Manual|U_Ignore_O
185	-40	100	0	1	-30	100	-38	100	-60	-30	0	0	0	Schoose	-30	S_Choose|U_Auto|S_Ignore_O|U_Manual|U_Override|S_Override|S_Auto|U_Ignore_O|U_Choose|AttnCk1|AttnCk2|S_Manual
186	-30	94	1	3	1	45	-88	100	-39	100	0	0	0	Uoverride	100	U_Override|S_Auto|S_Choose|U_Choose|S_Override|U_Manual|AttnCk2|U_Auto|AttnCk1|S_Manual|U_Ignore_O|S_Ignore_O
187	1	100	1	99	1	100	1	1	1	100	1	0	1	Signore	1	AttnCk2|S_Ignore_O|S_Choose|AttnCk1|U_Override|U_Auto|S_Manual|S_Override|U_Choose|S_Auto|U_Manual|U_Ignore_O
188	-50	100	-35	85	-37	100	-69	100	-51	100	0	0	0	Uoverride	100	AttnCk1|U_Override|S_Manual|S_Override|AttnCk2|U_Ignore_O|U_Manual|U_Auto|S_Auto|U_Choose|S_Choose|S_Ignore_O
189	-60	90	0	40	-70	30	-20	50	-70	0	0	0	0	Schoose	-70	S_Choose|AttnCk1|U_Ignore_O|U_Override|S_Manual|U_Auto|U_Choose|S_Override|S_Ignore_O|AttnCk2|U_Manual|S_Auto
190	-100	100	-19	21	-66	47	-78	90	-83	79	1	0	1	Uchoose	47	U_Choose|AttnCk2|U_Ignore_O|S_Auto|U_Auto|U_Manual|U_Override|AttnCk1|S_Ignore_O|S_Choose|S_Override|S_Manual
191	-90	100	-40	50	-80	90	-70	100	-65	90	1	1	2	Uoverride	100	U_Override|U_Auto|S_Auto|U_Manual|S_Override|S_Ignore_O|U_Choose|U_Ignore_O|AttnCk2|S_Choose|AttnCk1|S_Manual
192	-57	34	63	43	-40	42	-52	-37	37	38	1	1	2	Uignore	38	U_Ignore_O|AttnCk2|U_Manual|S_Ignore_O|S_Choose|U_Choose|S_Auto|S_Override|S_Manual|U_Auto|U_Override|AttnCk1
193	-85	-83	56	-78	80	38	62	60	62	-80	1	1	2	Uoverride	60	U_Override|S_Choose|U_Auto|S_Manual|S_Override|U_Ignore_O|AttnCk1|S_Auto|S_Ignore_O|AttnCk2|U_Manual|U_Choose
194	-34	25	-37	44	-39	33	-50	31	-44	46	1	1	2	Signore	-44	S_Ignore_O|S_Choose|AttnCk2|U_Manual|U_Override|S_Override|S_Manual|AttnCk1|U_Auto|U_Choose|S_Auto|U_Ignore_O
195	-75	100	-50	0	-70	100	-100	100	-50	100	0	0	0	Sauto	-50	S_Auto|S_Manual|AttnCk2|U_Override|U_Manual|U_Choose|U_Auto|S_Ignore_O|AttnCk1|S_Override|S_Choose|U_Ignore_O
196	-65	100	-60	0	-77	60	-60	100	-56	92	0	0	0	Signore	-56	S_Ignore_O|S_Choose|AttnCk1|U_Override|U_Manual|U_Ignore_O|U_Choose|S_Override|S_Auto|S_Manual|U_Auto|AttnCk2
197	0	0	0	70	0	70	0	70	0	70	0	0	0	Umanual	0	AttnCk2|U_Manual|AttnCk1|S_Choose|U_Ignore_O|S_Auto|U_Auto|S_Manual|U_Override|S_Ignore_O|U_Choose|S_Override
198	-100	100	-100	0	-100	100	-100	100	-100	100	0	0	0	Signore	-100	S_Ignore_O|U_Override|U_Auto|S_Auto|S_Manual|U_Choose|U_Ignore_O|S_Override|U_Manual|AttnCk2|AttnCk1|S_Choose
199	-50	100	1	0	-50	100	-50	100	100	100	0	0	0	Schoose	-50	AttnCk1|S_Choose|S_Auto|AttnCk2|U_Choose|U_Ignore_O|U_Auto|U_Manual|S_Override|S_Manual|S_Ignore_O|U_Override
200	-54	100	1	97	-58	95	-83	97	-61	100	0	1	1	Sauto	1	S_Auto|U_Choose|U_Ignore_O|U_Manual|AttnCk1|S_Manual|S_Override|U_Override|U_Auto|AttnCk2|S_Choose|S_Ignore_O
201	-62	35	-20	0	15	27	70	-40	40	-26	1	1	2	Uoverride	-40	U_Override|S_Ignore_O|U_Auto|S_Auto|S_Choose|AttnCk2|U_Choose|U_Ignore_O|AttnCk1|U_Manual|S_Override|S_Manual
202	-39	78	-42	80	-38	73	-39	90	-29	80	1	1	2	Uignore	80	U_Ignore_O|U_Override|U_Choose|S_Override|AttnCk1|AttnCk2|S_Manual|S_Auto|S_Choose|U_Auto|U_Manual|S_Ignore_O
203	7	85	0	0	0	90	3	91	0	91	0	0	0	Signore	0	S_Ignore_O|U_Manual|S_Manual|AttnCk2|AttnCk1|S_Auto|S_Override|U_Auto|U_Choose|S_Choose|U_Ignore_O|U_Override
204	-45	100	40	50	20	100	-55	70	-20	0	1	0	1	Sauto	40	S_Auto|AttnCk1|S_Choose|U_Choose|S_Ignore_O|U_Auto|U_Manual|S_Manual|S_Override|AttnCk2|U_Ignore_O|U_Override
205	-100	100	0	0	-100	0	-100	100	-100	100	0	0	0	Uchoose	0	AttnCk1|U_Choose|U_Manual|S_Ignore_O|S_Manual|AttnCk2|U_Override|U_Auto|U_Ignore_O|S_Override|S_Auto|S_Choose
206	0	10	0	0	1	0	1	10	0	10	1	0	1	Sauto	0	S_Auto|AttnCk1|S_Choose|U_Manual|U_Override|S_Ignore_O|S_Manual|U_Ignore_O|U_Auto|AttnCk2|S_Override|U_Choose
207	-60	100	-50	0	-100	80	-100	90	-100	100	0	0	0	Sauto	-50	S_Auto|U_Ignore_O|S_Override|S_Ignore_O|S_Manual|AttnCk1|U_Manual|AttnCk2|U_Auto|U_Override|S_Choose|U_Choose
208	19	13	17	21	1	10	14	-16	18	-16	1	1	2	Signore	18	S_Ignore_O|S_Manual|U_Ignore_O|U_Manual|U_Auto|U_Override|S_Choose|S_Auto|AttnCk2|S_Override|U_Choose|AttnCk1
209	-40	81	0	1	-30	29	-40	79	-20	70	0	1	1	Uoverride	79	U_Override|S_Ignore_O|U_Manual|S_Manual|S_Auto|U_Auto|S_Override|U_Ignore_O|AttnCk2|AttnCk1|U_Choose|S_Choose
210	0	92	0	55	0	82	0	89	0	94	0	0	0	Uauto	55	AttnCk2|AttnCk1|U_Auto|S_Manual|U_Override|U_Manual|U_Ignore_O|S_Override|S_Auto|U_Choose|S_Choose|S_Ignore_O
211	-60	90	-35	50	-70	80	-90	90	-90	80	0	0	0	Signore	-90	AttnCk1|S_Ignore_O|U_Manual|U_Override|U_Ignore_O|U_Choose|S_Auto|U_Auto|S_Manual|AttnCk2|S_Choose|S_Override
212	0	90	0	10	0	90	0	90	0	90	0	0	0	Uchoose	90	AttnCk1|U_Choose|S_Manual|U_Manual|S_Choose|U_Auto|U_Ignore_O|S_Auto|S_Override|S_Ignore_O|AttnCk2|U_Override
213	22	-50	32	44	50	-37	-29	-28	-20	-31	1	1	2	Smanual	22	S_Manual|S_Ignore_O|AttnCk1|U_Choose|S_Choose|U_Override|S_Auto|S_Override|U_Auto|U_Ignore_O|U_Manual|AttnCk2
214	-50	-50	-50	-50	-50	-50	-50	100	-50	-50	0	1	1	Soverride	-50	S_Override|S_Manual|AttnCk2|U_Manual|AttnCk1|U_Choose|S_Ignore_O|U_Ignore_O|U_Auto|S_Auto|U_Override|S_Choose
215	-50	100	0	0	-50	100	-17	100	-74	100	0	0	0	Soverride	-17	S_Override|S_Auto|U_Override|S_Manual|U_Manual|U_Auto|U_Ignore_O|S_Ignore_O|AttnCk1|U_Choose|S_Choose|AttnCk2
216	-100	100	-100	100	-100	100	0	100	-100	0	0	0	0	Uignore	0	AttnCk1|U_Ignore_O|U_Override|AttnCk2|U_Choose|U_Auto|S_Choose|S_Ignore_O|S_Override|S_Manual|U_Manual|S_Auto
217	1	87	1	1	1	94	-12	99	1	97	1	0	1	Signore	1	S_Ignore_O|U_Ignore_O|AttnCk2|S_Manual|S_Auto|S_Choose|U_Override|S_Override|AttnCk1|U_Manual|U_Auto|U_Choose
218	-40	30	-21	-42	-43	-33	-43	68	-25	27	1	1	2	Schoose	-43	S_Choose|AttnCk2|U_Auto|S_Override|U_Choose|U_Override|U_Ignore_O|U_Manual|AttnCk1|S_Auto|S_Manual|S_Ignore_O
219	-13	62	21	25	-20	13	-10	56	-37	38	0	0	0	Schoose	-20	S_Choose|U_Choose|S_Manual|AttnCk2|S_Override|U_Auto|S_Auto|U_Ignore_O|AttnCk1|U_Manual|U_Override|S_Ignore_O
220	-95	95	-80	20	-95	95	-95	95	-80	80	0	0	0	Uignore	80	U_Ignore_O|S_Auto|S_Manual|U_Manual|S_Ignore_O|U_Auto|S_Override|AttnCk1|U_Override|AttnCk2|S_Choose|U_Choose
221	15	24	1	-21	22	1	1	3	21	50	1	1	2	Uignore	50	U_Ignore_O|S_Choose|U_Manual|S_Ignore_O|U_Auto|U_Override|AttnCk2|S_Override|S_Auto|U_Choose|AttnCk1|S_Manual
222	0	0	0	0	0	0	0	0	0	0	1	1	2	Smanual	0	S_Manual|AttnCk1|U_Auto|U_Override|S_Override|S_Auto|S_Choose|S_Ignore_O|U_Choose|U_Manual|U_Ignore_O|AttnCk2
223	-100	100	0	0	-100	60	-100	100	-100	50	1	1	2	Sauto	0	S_Auto|U_Auto|AttnCk2|U_Override|U_Choose|S_Ignore_O|U_Manual|U_Ignore_O|AttnCk1|S_Override|S_Manual|S_Choose
224	-100	100	-100	100	-100	100	-100	100	-100	100	1	0	1	Uignore	100	AttnCk2|U_Ignore_O|S_Ignore_O|S_Override|S_Manual|S_Auto|AttnCk1|U_Manual|U_Auto|S_Choose|U_Override|U_Choose
225	-100	100	-85	19	-100	60	-100	100	-10	70	0	0	0	Uignore	70	U_Ignore_O|AttnCk2|S_Auto|AttnCk1|U_Override|U_Manual|S_Manual|S_Choose|U_Choose|S_Override|S_Ignore_O|U_Auto
226	-37	100	-19	34	-47	100	-50	100	-69	100	1	1	2	Umanual	100	U_Manual|U_Choose|S_Auto|U_Override|U_Ignore_O|S_Manual|S_Choose|AttnCk2|S_Override|U_Auto|AttnCk1|S_Ignore_O
227	-72	66	-39	51	-47	21	-64	55	-56	56	1	0	1	Uignore	56	U_Ignore_O|U_Choose|S_Auto|U_Override|U_Manual|AttnCk1|U_Auto|S_Ignore_O|S_Choose|AttnCk2|S_Override|S_Manual
228	20	59	1	51	51	63	33	1	1	68	1	1	2	Schoose	51	S_Choose|U_Override|U_Manual|U_Auto|U_Choose|S_Ignore_O|AttnCk2|U_Ignore_O|S_Override|S_Manual|AttnCk1|S_Auto
229	-2	100	1	100	2	100	3	100	1	100	1	0	1	Smanual	-2	S_Manual|U_Manual|AttnCk2|S_Choose|S_Override|S_Ignore_O|U_Auto|AttnCk1|U_Ignore_O|U_Choose|U_Override|S_Auto
230	14	14	8	10	10	10	7	15	15	15	1	1	2	Uchoose	10	U_Choose|S_Ignore_O|U_Override|U_Auto|S_Manual|S_Choose|U_Manual|U_Ignore_O|AttnCk2|S_Override|S_Auto|AttnCk1
231	-12	85	1	1	-1	1	-8	94	1	1	1	1	2	Uoverride	94	U_Override|AttnCk1|S_Auto|U_Ignore_O|S_Manual|S_Override|AttnCk2|U_Auto|U_Manual|S_Ignore_O|S_Choose|U_Choose
232	-45	87	-36	62	-15	35	-51	51	64	49	1	1	2	Soverride	-51	S_Override|U_Choose|U_Override|S_Ignore_O|S_Auto|S_Manual|U_Ignore_O|U_Manual|S_Choose|AttnCk1|AttnCk2|U_Auto
233	-90	95	60	75	-80	95	-90	91	-90	96	0	0	0	Uoverride	91	AttnCk2|U_Override|S_Choose|AttnCk1|U_Choose|S_Ignore_O|S_Auto|S_Manual|U_Ignore_O|U_Manual|U_Auto|S_Override
234	-29	90	-5	18	-40	29	-39	92	-50	51	0	0	0	Signore	-50	S_Ignore_O|S_Choose|S_Override|U_Ignore_O|AttnCk1|U_Override|AttnCk2|U_Auto|S_Auto|U_Choose|U_Manual|S_Manual
235	-100	10	-1	1	-100	-100	-100	10	-100	10	0	0	0	Sauto	-1	S_Auto|AttnCk1|U_Ignore_O|U_Manual|AttnCk2|S_Manual|S_Override|S_Ignore_O|U_Auto|U_Choose|S_Choose|U_Override
236	-15	14	-17	-18	-27	5	-25	20	-16	5	0	0	0	Uignore	5	U_Ignore_O|S_Override|U_Choose|S_Manual|AttnCk1|U_Auto|S_Choose|AttnCk2|S_Ignore_O|S_Auto|U_Override|U_Manual
237	-10	68	-20	69	-28	-69	40	42	-20	59	1	1	2	Uignore	59	U_Ignore_O|S_Override|U_Choose|U_Auto|U_Manual|S_Ignore_O|S_Auto|AttnCk2|U_Override|S_Manual|S_Choose|AttnCk1
238	1	2	1	5	-2	1	-2	1	3	64	1	1	2	Uignore	64	U_Ignore_O|U_Auto|S_Ignore_O|AttnCk2|U_Manual|U_Override|S_Auto|S_Choose|S_Override|U_Choose|S_Manual|AttnCk1
239	-11	56	36	32	-19	43	-31	63	-45	47	0	0	0	Sauto	36	S_Auto|AttnCk1|U_Auto|S_Override|U_Override|S_Manual|U_Manual|U_Choose|AttnCk2|U_Ignore_O|S_Choose|S_Ignore_O
240	1	100	1	1	0	1	1	100	1	2	0	1	1	Signore	1	AttnCk1|S_Ignore_O|U_Ignore_O|S_Choose|S_Auto|U_Choose|S_Override|S_Manual|U_Manual|U_Override|AttnCk2|U_Auto
241	-3	55	0	43	-4	16	-9	86	0	55	0	0	0	Uchoose	16	U_Choose|U_Override|S_Override|AttnCk1|U_Ignore_O|U_Manual|U_Auto|S_Manual|AttnCk2|S_Auto|S_Choose|S_Ignore_O
242	-50	50	-10	10	-19	10	-40	40	-50	20	0	0	0	Uignore	20	AttnCk1|AttnCk2|U_Ignore_O|S_Choose|U_Manual|U_Auto|U_Override|S_Auto|S_Ignore_O|U_Choose|S_Manual|S_Override
243	19	100	-20	56	-24	29	-100	100	-100	100	1	0	1	Sauto	-20	S_Auto|S_Manual|U_Auto|U_Ignore_O|U_Choose|AttnCk1|S_Override|U_Manual|S_Ignore_O|AttnCk2|U_Override|S_Choose
244	1	1	-9	-29	1	-29	3	1	1	1	1	1	2	Soverride	3	S_Override|U_Choose|U_Auto|S_Manual|S_Auto|AttnCk1|S_Ignore_O|U_Override|U_Manual|U_Ignore_O|AttnCk2|S_Choose
245	-40	100	-20	0	-20	100	-40	100	-30	100	0	0	0	Uoverride	100	AttnCk2|AttnCk1|U_Override|S_Auto|U_Manual|U_Ignore_O|U_Auto|S_Ignore_O|S_Manual|S_Override|U_Choose|S_Choose
246	-23	100	6	1	-2	98	-20	100	-18	95	0	0	0	Uchoose	98	U_Choose|U_Ignore_O|AttnCk2|U_Manual|U_Override|S_Choose|S_Manual|S_Auto|U_Auto|S_Override|AttnCk1|S_Ignore_O
247	45	42	73	51	54	40	61	51	55	26	1	1	2	Schoose	54	S_Choose|S_Auto|AttnCk1|S_Manual|S_Ignore_O|U_Choose|U_Override|U_Manual|U_Ignore_O|AttnCk2|U_Auto|S_Override
248	-57	30	-100	1	-100	1	-100	31	-100	-100	0	0	0	Signore	-100	S_Ignore_O|AttnCk2|U_Ignore_O|S_Choose|AttnCk1|S_Override|U_Choose|U_Auto|U_Override|S_Manual|U_Manual|S_Auto
249	-40	78	-2	0	-9	40	-54	90	-29	67	0	0	0	Signore	-29	S_Ignore_O|U_Override|S_Choose|U_Ignore_O|AttnCk2|U_Auto|U_Manual|S_Manual|S_Auto|S_Override|U_Choose|AttnCk1
250	-21	100	-19	100	-15	100	-23	100	-19	100	0	0	0	Soverride	-23	AttnCk1|S_Override|AttnCk2|S_Choose|U_Override|S_Manual|U_Choose|S_Ignore_O|U_Manual|U_Ignore_O|S_Auto|U_Auto
251	-34	97	1	1	-13	71	-63	93	-20	85	0	0	0	Uignore	85	S_Ignore_O|U_Ignore_O|U_Override|S_Auto|S_Override|U_Auto|U_Choose|AttnCk2|S_Choose|S_Manual|AttnCk1|U_Manual
252	20	84	82	17	42	-15	49	76	44	-29	1	1	2	Smanual	20	S_Manual|S_Ignore_O|U_Manual|S_Auto|U_Auto|S_Override|U_Ignore_O|AttnCk1|AttnCk2|U_Override|U_Choose|S_Choose
253	-92	78	1	40	-40	92	-100	85	-100	90	0	0	0	Schoose	-40	S_Choose|S_Ignore_O|AttnCk2|U_Auto|S_Manual|U_Override|AttnCk1|S_Auto|U_Manual|U_Choose|S_Override|U_Ignore_O
254	-40	30	-5	5	-50	20	-50	50	-40	20	0	0	0	Smanual	-40	S_Manual|U_Auto|U_Ignore_O|AttnCk1|S_Override|S_Auto|S_Ignore_O|AttnCk2|U_Manual|S_Choose|U_Override|U_Choose
255	-100	100	-50	50	-100	100	-100	100	-100	100	0	0	0	Signore	-100	S_Ignore_O|U_Ignore_O|U_Choose|U_Auto|U_Manual|S_Choose|AttnCk1|S_Override|AttnCk2|U_Override|S_Auto|S_Manual
256	37	-21	29	25	-28	33	-20	-35	32	39	0	0	0	Uignore	39	U_Ignore_O|AttnCk2|S_Choose|S_Ignore_O|U_Manual|U_Auto|S_Auto|S_Manual|S_Override|U_Override|AttnCk1|U_Choose
257	24	-26	24	8	21	22	38	27	-32	13	1	1	2	Uauto	8	U_Auto|S_Manual|S_Override|U_Manual|S_Choose|U_Choose|U_Ignore_O|S_Ignore_O|S_Auto|AttnCk1|AttnCk2|U_Override
258	-2	52	76	64	-47	100	-100	100	-100	100	0	1	1	Sauto	76	S_Auto|AttnCk2|S_Choose|S_Override|U_Override|S_Manual|U_Ignore_O|AttnCk1|U_Choose|U_Auto|S_Ignore_O|U_Manual
259	-100	100	-100	100	-100	100	-100	100	-100	100	1	0	1	Uignore	100	U_Ignore_O|U_Auto|U_Override|S_Ignore_O|S_Choose|U_Manual|S_Manual|U_Choose|AttnCk2|AttnCk1|S_Override|S_Auto
260	-25	96	-24	94	-88	56	90	71	-100	70	1	1	2	Sauto	-24	S_Auto|S_Ignore_O|U_Auto|U_Manual|U_Override|S_Choose|AttnCk1|AttnCk2|U_Choose|S_Manual|S_Override|U_Ignore_O
261	-60	72	-53	93	-65	6	-29	99	-40	66	1	1	2	Uignore	66	U_Ignore_O|S_Override|AttnCk1|U_Choose|S_Auto|S_Manual|S_Choose|U_Override|AttnCk2|U_Manual|U_Auto|S_Ignore_O
262	2	0	2	0	0	0	0	0	0	0	0	0	0	Smanual	2	S_Manual|AttnCk1|S_Auto|U_Override|AttnCk2|S_Choose|U_Auto|U_Manual|U_Ignore_O|S_Ignore_O|S_Override|U_Choose
263	-69	43	-9	-51	-42	48	-100	100	-90	80	0	0	0	Uignore	80	U_Ignore_O|U_Auto|AttnCk2|S_Ignore_O|S_Auto|U_Override|S_Override|AttnCk1|S_Manual|U_Manual|U_Choose|S_Choose
264	1	100	38	99	1	100	1	100	2	100	0	0	0	Uignore	100	U_Ignore_O|AttnCk1|S_Override|AttnCk2|S_Ignore_O|S_Choose|U_Override|U_Choose|S_Auto|S_Manual|U_Auto|U_Manual
265	51	14	51	51	87	89	63	-20	54	54	1	1	2	Smanual	51	S_Manual|U_Auto|S_Auto|S_Override|AttnCk2|S_Ignore_O|U_Ignore_O|U_Manual|U_Choose|S_Choose|AttnCk1|U_Override
266	26	21	-18	-30	26	18	23	22	32	-39	1	1	2	Sauto	-18	S_Auto|U_Auto|S_Ignore_O|S_Override|AttnCk1|U_Override|U_Manual|U_Ignore_O|U_Choose|S_Manual|AttnCk2|S_Choose
267	-100	57	-57	46	-100	71	-91	100	-100	95	1	0	1	Umanual	57	U_Manual|S_Auto|AttnCk1|S_Override|S_Choose|U_Choose|U_Auto|S_Ignore_O|U_Ignore_O|U_Override|AttnCk2|S_Manual
268	-100	100	50	50	0	0	-90	100	-100	100	0	0	0	Sauto	50	AttnCk1|S_Auto|S_Manual|S_Override|U_Manual|U_Ignore_O|U_Choose|AttnCk2|S_Ignore_O|S_Choose|U_Auto|U_Override
269	-13	98	-66	0	-19	83	-15	98	-18	95	0	0	0	Sauto	-66	S_Auto|AttnCk1|S_Ignore_O|S_Override|U_Choose|S_Manual|AttnCk2|U_Auto|U_Ignore_O|U_Manual|U_Override|S_Choose
270	-29	82	0	60	0	70	0	88	10	86	0	0	0	Uchoose	70	U_Choose|S_Override|AttnCk1|U_Manual|U_Auto|U_Ignore_O|AttnCk2|S_Choose|S_Auto|S_Ignore_O|S_Manual|U_Override
271	-50	95	-75	75	-70	95	-100	90	-80	100	0	0	0	Uoverride	90	U_Override|AttnCk2|S_Auto|U_Auto|S_Override|U_Choose|S_Manual|U_Manual|AttnCk1|S_Ignore_O|U_Ignore_O|S_Choose
272	0	100	-25	25	0	100	-25	100	-25	95	0	0	0	Uoverride	100	U_Override|U_Manual|U_Choose|S_Choose|S_Auto|S_Override|S_Ignore_O|U_Ignore_O|AttnCk1|S_Manual|AttnCk2|U_Auto
273	-100	100	-50	5	-70	100	-100	70	-60	100	0	0	0	Uoverride	70	U_Override|AttnCk2|U_Ignore_O|U_Choose|U_Manual|S_Choose|S_Auto|AttnCk1|S_Override|S_Ignore_O|S_Manual|U_Auto
274	-78	81	-76	90	-68	76	-64	87	-78	78	1	1	2	Uchoose	76	U_Choose|AttnCk2|S_Choose|U_Auto|S_Auto|U_Manual|AttnCk1|S_Override|U_Override|U_Ignore_O|S_Ignore_O|S_Manual
275	-61	20	-60	-14	39	-18	-61	-24	-60	-30	0	1	1	Uignore	-30	U_Ignore_O|S_Choose|S_Manual|S_Override|U_Manual|AttnCk2|S_Ignore_O|AttnCk1|U_Choose|U_Override|S_Auto|U_Auto
276	-57	87	-57	100	-71	91	-69	95	-50	70	0	1	1	Signore	-50	S_Ignore_O|S_Manual|S_Override|S_Auto|S_Choose|U_Auto|U_Choose|AttnCk1|U_Manual|U_Override|AttnCk2|U_Ignore_O
277	-39	87	-3	7	-80	58	-61	74	-77	60	0	1	1	Uchoose	58	U_Choose|S_Ignore_O|U_Override|AttnCk1|S_Auto|S_Override|U_Ignore_O|AttnCk2|S_Choose|U_Auto|S_Manual|U_Manual
278	-100	70	-50	-50	-75	50	-80	45	-75	60	0	0	0	Uauto	-50	U_Auto|U_Manual|U_Override|AttnCk2|S_Choose|S_Ignore_O|AttnCk1|S_Override|S_Manual|U_Ignore_O|S_Auto|U_Choose
279	-70	50	0	40	-25	25	-70	100	-50	40	0	0	0	Uoverride	100	U_Override|S_Auto|AttnCk1|S_Choose|U_Ignore_O|U_Manual|U_Choose|S_Ignore_O|U_Auto|S_Manual|S_Override|AttnCk2
280	-97	96	0	0	-86	42	-100	90	-92	92	0	0	0	Signore	-92	S_Ignore_O|U_Manual|U_Auto|U_Override|U_Ignore_O|S_Manual|AttnCk1|S_Choose|S_Auto|U_Choose|S_Override|AttnCk2
281	-100	-100	-100	-49	-100	-74	-100	-100	-100	-88	1	1	2	Schoose	-100	S_Choose|S_Override|U_Override|S_Auto|U_Manual|S_Manual|U_Ignore_O|U_Choose|U_Auto|AttnCk1|S_Ignore_O|AttnCk2
282	-100	100	-53	66	-90	100	-61	100	-40	87	1	1	2	Uoverride	100	U_Override|U_Manual|S_Manual|U_Auto|S_Choose|U_Choose|U_Ignore_O|S_Auto|S_Ignore_O|AttnCk2|S_Override|AttnCk1
283	-6	74	-53	1	-12	1	-13	93	-45	-1	0	0	0	Sauto	-53	S_Auto|AttnCk1|U_Auto|U_Manual|U_Choose|S_Manual|U_Override|S_Ignore_O|U_Ignore_O|S_Override|AttnCk2|S_Choose
284	36	91	-31	58	41	53	-56	71	-28	99	1	1	2	Uignore	99	U_Ignore_O|U_Manual|S_Ignore_O|S_Auto|AttnCk1|U_Choose|U_Auto|S_Override|S_Choose|S_Manual|AttnCk2|U_Override
285	-50	100	-43	35	-60	50	-16	100	0	29	0	0	0	Soverride	-16	S_Override|AttnCk1|U_Manual|U_Auto|S_Manual|U_Ignore_O|S_Auto|S_Ignore_O|U_Override|AttnCk2|S_Choose|U_Choose
286	-29	58	-23	1	1	72	25	56	-64	53	1	1	2	Schoose	1	S_Choose|S_Override|U_Auto|U_Override|S_Auto|U_Choose|U_Manual|U_Ignore_O|AttnCk2|S_Ignore_O|S_Manual|AttnCk1
287	-50	100	0	0	25	25	-50	75	-40	25	0	0	0	Smanual	-50	S_Manual|U_Choose|AttnCk2|U_Auto|S_Override|S_Choose|U_Override|U_Ignore_O|S_Ignore_O|U_Manual|AttnCk1|S_Auto
288	-16	75	-19	50	-16	41	-34	72	-15	56	0	1	1	Sauto	-19	AttnCk1|S_Auto|S_Manual|U_Choose|S_Override|U_Ignore_O|S_Ignore_O|U_Auto|U_Override|U_Manual|AttnCk2|S_Choose
289	-91	87	-20	0	-8	15	-95	100	-61	60	0	0	0	Smanual	-91	S_Manual|U_Ignore_O|S_Auto|U_Override|S_Override|U_Auto|S_Ignore_O|U_Choose|S_Choose|AttnCk2|AttnCk1|U_Manual
290	-100	100	-11	52	-10	46	-100	100	-44	42	0	1	1	Uignore	42	AttnCk1|U_Ignore_O|U_Choose|S_Auto|S_Choose|U_Auto|S_Override|S_Ignore_O|S_Manual|U_Override|U_Manual|AttnCk2
291	-88	94	-93	94	-91	90	-92	95	-92	92	0	0	0	Uoverride	95	AttnCk1|U_Override|S_Manual|U_Ignore_O|S_Override|S_Ignore_O|S_Choose|AttnCk2|U_Manual|S_Auto|U_Choose|U_Auto
292	-44	85	-56	63	-55	22	-58	91	-51	15	1	1	2	Uoverride	91	AttnCk2|U_Override|S_Override|AttnCk1|S_Choose|U_Choose|U_Manual|U_Ignore_O|S_Manual|U_Auto|S_Auto|S_Ignore_O
293	-8	40	1	40	-27	7	8	52	42	65	1	1	2	Soverride	8	S_Override|U_Manual|AttnCk1|U_Override|AttnCk2|U_Choose|U_Auto|S_Auto|S_Ignore_O|U_Ignore_O|S_Manual|S_Choose
294	-91	75	-1	23	3	52	-100	86	-85	5	0	0	0	Signore	-85	AttnCk1|S_Ignore_O|U_Override|U_Choose|S_Manual|AttnCk2|U_Auto|U_Manual|S_Choose|S_Override|U_Ignore_O|S_Auto
295	55	-16	40	64	37	-37	48	46	-34	41	1	1	2	Uchoose	-37	U_Choose|S_Override|S_Choose|U_Ignore_O|U_Manual|AttnCk2|AttnCk1|S_Auto|S_Ignore_O|U_Auto|S_Manual|U_Override
296	21	20	14	35	-18	16	12	15	-18	51	1	1	2	Sauto	14	S_Auto|U_Ignore_O|S_Manual|U_Auto|S_Ignore_O|AttnCk1|AttnCk2|S_Choose|S_Override|U_Override|U_Manual|U_Choose
297	-48	49	-47	60	-83	59	-71	80	-66	-23	0	1	1	Schoose	-83	S_Choose|U_Override|S_Ignore_O|S_Override|U_Choose|U_Manual|S_Auto|AttnCk2|U_Ignore_O|U_Auto|AttnCk1|S_Manual
298	-50	90	-60	50	80	90	-80	90	-80	95	0	1	1	Uchoose	90	AttnCk1|U_Choose|U_Ignore_O|U_Manual|U_Override|S_Override|S_Ignore_O|S_Choose|U_Auto|AttnCk2|S_Manual|S_Auto
299	43	-44	30	-29	33	47	35	-31	29	23	1	1	2	Uignore	23	AttnCk1|U_Ignore_O|S_Auto|S_Ignore_O|S_Choose|U_Manual|U_Override|U_Auto|U_Choose|AttnCk2|S_Override|S_Manual
300	-70	76	-90	89	-88	81	-92	98	-77	90	0	1	1	Uoverride	98	U_Override|S_Ignore_O|U_Choose|U_Ignore_O|U_Manual|S_Choose|S_Manual|S_Auto|S_Override|AttnCk2|AttnCk1|U_Auto
301	-49	100	-40	40	-40	40	-60	100	-50	50	1	1	2	Signore	-50	S_Ignore_O|S_Choose|U_Override|U_Manual|U_Auto|AttnCk1|S_Auto|S_Override|U_Ignore_O|U_Choose|AttnCk2|S_Manual
302	-71	94	1	67	4	21	-81	96	-64	65	0	1	1	Uignore	65	U_Ignore_O|U_Override|S_Ignore_O|S_Manual|U_Auto|S_Auto|AttnCk2|U_Manual|AttnCk1|U_Choose|S_Override|S_Choose
303	-100	100	-85	45	-75	75	73	100	-55	51	1	0	1	Smanual	-100	S_Manual|AttnCk2|U_Override|AttnCk1|U_Manual|U_Choose|S_Override|S_Choose|S_Auto|U_Auto|S_Ignore_O|U_Ignore_O
304	-14	54	-15	45	1	50	-19	54	-42	58	1	1	2	Sauto	-15	S_Auto|S_Ignore_O|U_Override|U_Manual|U_Auto|U_Choose|S_Choose|S_Manual|U_Ignore_O|AttnCk2|S_Override|AttnCk1
305	-11	91	0	0	-15	78	-15	99	-33	43	0	0	0	Uauto	0	U_Auto|S_Manual|S_Ignore_O|S_Choose|U_Choose|U_Manual|U_Ignore_O|AttnCk1|S_Auto|AttnCk2|S_Override|U_Override
306	-87	100	1	1	-57	100	-87	100	-68	100	0	0	0	Schoose	-57	S_Choose|U_Ignore_O|U_Auto|S_Override|AttnCk2|AttnCk1|S_Manual|U_Choose|U_Manual|S_Ignore_O|U_Override|S_Auto
307	-75	77	-43	55	-27	60	-49	78	-58	65	1	1	2	Uchoose	60	U_Choose|AttnCk2|S_Ignore_O|U_Ignore_O|S_Manual|S_Choose|U_Auto|S_Auto|U_Manual|U_Override|S_Override|AttnCk1
308	25	65	-7	1	-8	79	-80	100	-27	72	0	0	0	Uchoose	79	AttnCk1|U_Choose|S_Choose|S_Override|U_Auto|S_Ignore_O|U_Override|U_Ignore_O|U_Manual|S_Manual|S_Auto|AttnCk2
309	-30	30	-21	-9	-21	14	-19	11	-21	30	0	0	0	Uignore	30	AttnCk1|U_Ignore_O|U_Manual|S_Auto|S_Override|S_Manual|S_Ignore_O|U_Auto|AttnCk2|S_Choose|U_Override|U_Choose
310	-50	80	0	50	0	50	0	60	-30	60	0	0	0	Uchoose	50	U_Choose|S_Override|U_Auto|S_Auto|S_Manual|U_Override|S_Choose|AttnCk1|AttnCk2|U_Ignore_O|S_Ignore_O|U_Manual
311	-1	1	1	1	1	8	7	5	1	1	0	0	0	Smanual	-1	S_Manual|U_Ignore_O|S_Choose|U_Manual|U_Auto|AttnCk2|U_Override|S_Override|U_Choose|S_Auto|S_Ignore_O|AttnCk1
312	-41	44	1	0	-28	50	-34	75	-31	50	1	1	2	Uauto	0	U_Auto|U_Override|U_Choose|AttnCk2|S_Manual|U_Ignore_O|S_Override|U_Manual|S_Auto|AttnCk1|S_Ignore_O|S_Choose
313	-64	99	-51	99	-59	100	-64	100	-61	100	1	0	1	Soverride	-64	S_Override|S_Ignore_O|AttnCk2|AttnCk1|S_Choose|S_Manual|U_Choose|U_Manual|U_Override|U_Auto|S_Auto|U_Ignore_O
314	-40	33	1	1	-4	29	-57	51	-39	7	0	0	0	Uchoose	29	AttnCk2|U_Choose|U_Auto|S_Auto|S_Ignore_O|U_Ignore_O|S_Choose|U_Manual|S_Override|AttnCk1|U_Override|S_Manual
315	-10	43	0	-1	-18	25	-19	42	-40	40	0	0	0	Uignore	40	U_Ignore_O|S_Choose|U_Override|U_Auto|AttnCk1|S_Ignore_O|U_Manual|U_Choose|S_Override|S_Auto|AttnCk2|S_Manual
316	-52	100	-87	100	-100	100	-83	100	-100	97	0	1	1	Smanual	-52	S_Manual|AttnCk1|S_Choose|S_Ignore_O|AttnCk2|U_Ignore_O|U_Override|U_Choose|U_Auto|S_Override|S_Auto|U_Manual
317	6	99	100	11	49	34	10	47	24	100	1	1	2	Uignore	100	U_Ignore_O|S_Auto|AttnCk2|S_Manual|S_Override|U_Override|U_Auto|AttnCk1|U_Choose|S_Choose|U_Manual|S_Ignore_O
318	-32	-32	-29	-29	-29	-30	-30	-29	-26	-38	1	1	2	Soverride	-30	S_Override|S_Auto|S_Choose|S_Ignore_O|U_Auto|U_Choose|U_Override|U_Ignore_O|AttnCk1|S_Manual|U_Manual|AttnCk2
319	-29	100	0	0	-41	100	-78	100	-29	100	0	1	1	Umanual	100	U_Manual|U_Ignore_O|S_Auto|S_Ignore_O|S_Manual|S_Override|U_Auto|AttnCk2|AttnCk1|U_Choose|S_Choose|U_Override
320	-5	71	-2	67	-4	92	0	74	1	79	1	1	2	Signore	1	S_Ignore_O|S_Override|U_Choose|U_Manual|U_Auto|S_Manual|U_Ignore_O|AttnCk2|AttnCk1|U_Override|S_Auto|S_Choose
321	1	60	0	0	-11	45	15	79	-17	10	0	0	0	Smanual	1	S_Manual|S_Choose|S_Ignore_O|AttnCk1|AttnCk2|U_Choose|U_Auto|U_Override|S_Override|U_Manual|S_Auto|U_Ignore_O
322	-11	83	-7	10	-17	68	-68	87	-81	68	1	0	1	Signore	-81	AttnCk2|S_Ignore_O|S_Auto|S_Choose|S_Manual|U_Ignore_O|U_Choose|U_Auto|U_Override|AttnCk1|U_Manual|S_Override
323	-10	80	-10	80	-10	80	-17	80	-10	80	1	1	2	Uignore	80	U_Ignore_O|U_Override|U_Manual|S_Choose|S_Ignore_O|AttnCk2|U_Auto|S_Manual|AttnCk1|S_Auto|S_Override|U_Choose
324	20	100	20	100	20	20	100	100	-100	100	0	1	1	Smanual	20	AttnCk2|S_Manual|S_Choose|U_Choose|S_Ignore_O|S_Auto|U_Override|U_Ignore_O|AttnCk1|U_Auto|U_Manual|S_Override
325	-94	100	-96	98	-98	100	-93	98	-92	99	1	1	2	Signore	-92	S_Ignore_O|S_Override|S_Manual|U_Ignore_O|S_Auto|U_Choose|U_Override|U_Auto|AttnCk2|U_Manual|AttnCk1|S_Choose
326	-98	81	-1	2	2	88	-89	-1	-81	98	1	0	1	Signore	-81	AttnCk2|S_Ignore_O|U_Choose|S_Choose|U_Ignore_O|U_Manual|S_Manual|S_Override|AttnCk1|U_Override|S_Auto|U_Auto
327	-90	100	-20	0	-80	80	-90	100	-80	100	1	0	1	Uchoose	80	U_Choose|AttnCk1|S_Auto|U_Manual|U_Ignore_O|S_Choose|S_Ignore_O|U_Override|AttnCk2|S_Override|S_Manual|U_Auto
328	37	45	76	55	49	43	-16	-42	25	29	1	1	2	Uauto	55	U_Auto|S_Override|U_Override|S_Auto|AttnCk2|U_Choose|S_Manual|S_Choose|AttnCk1|U_Manual|S_Ignore_O|U_Ignore_O
329	21	53	-43	16	-36	27	-100	65	-24	-18	1	1	2	Sauto	-43	S_Auto|U_Choose|S_Override|AttnCk1|AttnCk2|S_Manual|U_Ignore_O|S_Choose|U_Manual|U_Auto|U_Override|S_Ignore_O
330	-20	100	0	0	-10	60	-26	100	-20	100	0	0	0	Uauto	0	U_Auto|S_Auto|S_Override|S_Manual|S_Choose|AttnCk2|U_Override|U_Manual|AttnCk1|U_Choose|U_Ignore_O|S_Ignore_O
331	-10	70	-10	0	-20	70	-20	90	-10	70	1	0	1	Smanual	-10	S_Manual|S_Auto|U_Ignore_O|U_Choose|S_Override|AttnCk1|U_Manual|AttnCk2|S_Ignore_O|U_Auto|U_Override|S_Choose
332	32	33	49	48	58	34	1	47	20	29	1	1	2	Umanual	33	U_Manual|U_Auto|S_Ignore_O|AttnCk1|U_Ignore_O|S_Manual|S_Choose|U_Choose|AttnCk2|U_Override|S_Override|S_Auto
333	-20	100	50	70	10	100	50	100	90	100	0	0	0	Schoose	10	AttnCk1|S_Choose|S_Auto|U_Auto|AttnCk2|S_Override|S_Manual|U_Manual|U_Override|S_Ignore_O|U_Choose|U_Ignore_O
334	26	32	60	10	20	10	10	20	-36	40	1	1	2	Uignore	40	U_Ignore_O|S_Auto|AttnCk2|U_Override|S_Override|AttnCk1|U_Auto|S_Ignore_O|U_Manual|S_Manual|U_Choose|S_Choose
335	-97	76	1	0	-38	49	36	23	-41	12	0	1	1	Umanual	76	U_Manual|AttnCk1|U_Override|S_Manual|S_Ignore_O|U_Ignore_O|S_Choose|S_Override|S_Auto|U_Auto|U_Choose|AttnCk2
336	-30	30	-20	20	-30	20	-40	20	-20	20	1	1	2	Schoose	-30	S_Choose|U_Ignore_O|S_Auto|AttnCk1|U_Override|S_Ignore_O|U_Auto|U_Choose|S_Override|S_Manual|AttnCk2|U_Manual
337	-50	100	0	0	-50	100	-50	100	0	100	0	0	0	Uchoose	100	U_Choose|AttnCk2|S_Override|S_Ignore_O|U_Ignore_O|U_Override|S_Manual|U_Auto|S_Auto|U_Manual|S_Choose|AttnCk1
338	-60	100	-55	100	3	100	-58	99	-62	98	0	0	0	Uoverride	99	U_Override|S_Choose|U_Ignore_O|AttnCk2|AttnCk1|S_Manual|S_Ignore_O|S_Override|U_Auto|S_Auto|U_Choose|U_Manual
339	0	70	0	0	0	25	-20	50	0	30	0	0	0	Smanual	0	S_Manual|S_Override|S_Auto|U_Override|U_Choose|AttnCk1|U_Auto|U_Manual|AttnCk2|U_Ignore_O|S_Ignore_O|S_Choose
340	-43	63	-21	58	-31	70	-77	89	-29	22	1	0	1	Uchoose	70	AttnCk2|U_Choose|AttnCk1|U_Auto|U_Override|S_Ignore_O|U_Manual|S_Auto|S_Override|U_Ignore_O|S_Manual|S_Choose
341	0	100	0	0	0	60	-50	100	0	75	1	0	1	Sauto	0	AttnCk2|S_Auto|S_Manual|S_Ignore_O|U_Override|S_Choose|U_Manual|U_Ignore_O|U_Auto|S_Override|AttnCk1|U_Choose
342	-40	78	1	1	-36	71	-28	50	-74	51	0	1	1	Uauto	1	U_Auto|U_Override|S_Ignore_O|U_Manual|U_Choose|AttnCk1|S_Manual|AttnCk2|S_Choose|U_Ignore_O|S_Override|S_Auto
343	1	100	13	34	2	48	-44	100	-46	100	0	0	0	Smanual	1	S_Manual|AttnCk1|S_Choose|AttnCk2|U_Choose|U_Override|U_Manual|S_Override|U_Ignore_O|S_Ignore_O|U_Auto|S_Auto
344	-100	90	-32	-1	-60	50	-90	90	-90	56	0	0	0	Schoose	-60	AttnCk1|S_Choose|U_Manual|S_Override|U_Override|U_Auto|AttnCk2|S_Manual|S_Ignore_O|U_Choose|U_Ignore_O|S_Auto
345	28	79	31	81	49	79	35	68	27	78	1	1	2	Schoose	49	S_Choose|U_Override|AttnCk1|U_Ignore_O|U_Choose|U_Auto|S_Override|S_Auto|AttnCk2|S_Manual|U_Manual|S_Ignore_O
346	-99	100	-9	100	-90	99	-85	100	-91	98	0	0	0	Schoose	-90	S_Choose|S_Ignore_O|AttnCk2|S_Override|U_Ignore_O|U_Manual|U_Auto|AttnCk1|S_Manual|U_Choose|U_Override|S_Auto
347	-38	100	-18	2	-18	80	-96	100	-20	89	0	0	0	Uoverride	100	U_Override|S_Choose|U_Choose|AttnCk2|U_Ignore_O|S_Ignore_O|U_Manual|S_Auto|AttnCk1|S_Manual|U_Auto|S_Override
348	-10	100	0	19	-38	100	-26	98	-20	100	0	0	0	Uoverride	90	U_Override|AttnCk1|S_Override|U_Choose|S_Manual|U_Ignore_O|S_Auto|U_Manual|S_Ignore_O|S_Choose|AttnCk2|U_Auto
349	-9	0	0	0	0	0	0	0	1	0	1	1	2	Schoose	0	S_Choose|S_Manual|U_Ignore_O|AttnCk2|U_Override|S_Ignore_O|AttnCk1|S_Auto|U_Choose|U_Auto|S_Override|U_Manual
350	0	100	0	0	0	15	0	100	0	100	0	0	0	Soverride	0	AttnCk1|S_Override|S_Choose|S_Ignore_O|U_Choose|U_Auto|AttnCk2|U_Override|U_Ignore_O|S_Auto|S_Manual|U_Manual
351	-60	100	1	40	-20	40	-60	80	-20	20	1	0	1	Umanual	100	U_Manual|S_Auto|U_Ignore_O|S_Override|S_Choose|S_Ignore_O|S_Manual|AttnCk2|U_Override|U_Choose|U_Auto|AttnCk1
352	-32	100	-37	47	0	1	-43	100	-15	47	1	0	1	Uoverride	100	U_Override|S_Ignore_O|S_Manual|S_Choose|AttnCk1|U_Choose|S_Auto|AttnCk2|U_Manual|S_Override|U_Ignore_O|U_Auto
353	-15	87	-27	45	1	38	-27	82	-48	44	1	1	2	Uoverride	82	U_Override|U_Choose|U_Manual|S_Ignore_O|AttnCk1|S_Override|S_Choose|AttnCk2|S_Manual|U_Auto|U_Ignore_O|S_Auto
354	15	78	-30	28	-5	19	-11	78	-9	-23	1	1	2	Uoverride	78	U_Override|U_Manual|S_Choose|S_Ignore_O|S_Manual|S_Override|U_Ignore_O|AttnCk2|U_Choose|S_Auto|U_Auto|AttnCk1
355	-83	90	-41	95	-45	83	-75	90	-73	86	0	0	0	Uoverride	90	AttnCk1|U_Override|U_Manual|S_Override|U_Ignore_O|U_Auto|U_Choose|S_Manual|AttnCk2|S_Choose|S_Ignore_O|S_Auto
356	-50	100	0	10	-80	80	-70	95	-70	50	0	0	0	Uauto	10	U_Auto|U_Ignore_O|S_Ignore_O|S_Override|AttnCk1|U_Choose|S_Choose|S_Auto|U_Override|S_Manual|AttnCk2|U_Manual
357	-58	90	2	-11	-23	60	-74	90	-58	81	0	0	0	Schoose	-23	S_Choose|AttnCk1|S_Auto|S_Manual|AttnCk2|S_Ignore_O|U_Choose|U_Manual|S_Override|U_Ignore_O|U_Override|U_Auto
358	0	69	-55	0	-33	85	0	100	-100	1	0	0	0	Soverride	0	AttnCk1|S_Override|U_Choose|S_Ignore_O|U_Ignore_O|S_Auto|U_Manual|S_Choose|AttnCk2|U_Auto|S_Manual|U_Override
359	-32	97	5	27	27	33	-61	-40	-36	69	1	1	2	Uignore	69	U_Manual|U_Ignore_O|S_Manual|S_Auto|U_Override|S_Ignore_O|S_Override|U_Choose|S_Choose|U_Auto|AttnCk2|AttnCk1
360	-18	20	-10	0	1	0	-79	50	-19	16	0	0	0	Uignore	16	U_Ignore_O|U_Manual|U_Auto|AttnCk1|S_Manual|S_Choose|S_Auto|U_Choose|S_Ignore_O|S_Override|U_Override|AttnCk2
